# Global determinants of insect genetic diversity

Authors: Connor M French<sup>1,2\*</sup>, Laura D Bertola<sup>1,3</sup>, Ana C Carnaval<sup>1,2</sup>, Evan P Economo<sup>4</sup>, Jamie M Kass<sup>4</sup>, David J Lohman<sup>1,2,5</sup>, Katharine A Marske<sup>6</sup>, Rudolf Meier<sup>7,8</sup>, Isaac Overcast<sup>2,9,10</sup>, Andrew J. Rominger<sup>11,12</sup>, Phillip Staniczenko<sup>13</sup>, and Michael J Hickerson<sup>1,2,14</sup>

<sup>1</sup> Department of Biology, City College of New York, New York, New York, USA

<sup>2</sup> Biology Ph.D. Program, The Graduate Center, City University of New York, New York, New York, USA

<sup>3</sup> Section for Computational and RNA Biology, Department of Biology, University of Copenhagen, Copenhagen N 2200, Denmark

<sup>4</sup> Biodiversity and Biocomplexity Unit, Okinawa Institute of Science and Technology, Onna, Okinawa, Japan, 904-0495

<sup>5</sup> Entomology Section, National Museum of Natural History, Manila, Philippines

<sup>6</sup> Department of Biology, University of Oklahoma, Norman, Oklahoma, USA

<sup>7</sup> Humboldt University, Berlin, Germany

<sup>8</sup> Museum für Naturkunde, Berlin, Germany

<sup>9</sup> Institut de Biologie de l'Ecole Normale Supérieure, Paris, France

<sup>10</sup> Department of Vertebrate Zoology, American Museum of Natural History, New York, New York, USA

<sup>11</sup> School of Biology and Ecology, University of Maine, Orono, ME, USA

<sup>12</sup> Maine Center for Genetics in the Environment, University of Maine, Orono, ME, USA

<sup>13</sup> Department of Biology, Brooklyn College, Brooklyn, New York, USA

<sup>14</sup> Division of Invertebrate Zoology, American Museum of Natural History, New York, New York, USA

\*email: [cfrench@gradcenter.cuny.edu](mailto:cfrench@gradcenter.cuny.edu)

## Abstract

Understanding global patterns of genetic diversity (GD) is essential for describing, monitoring, and preserving life on Earth. To date, efforts to map macrogenetic patterns have been restricted to vertebrates that comprise only a small fraction of Earth's biodiversity. Here, we construct the first global map of predicted insect GD, derived from open data. We calculate the GD mean (GDM) and evenness (GDE) of insect assemblages across the globe, identify environmental correlates of insect GD, and make predictions. Based on the largest single-locus genetic dataset assembled yet, we find that GDE follows a quadratic latitudinal gradient peaking in the

subtropics. Both GDM and GDE correlate with seasonally hot temperatures, as well as climate stability since the LGM. Our models explain 27.9% and 24.0% of the observed variation in GDM and GDE in insects, respectively, making an important step towards understanding global biodiversity patterns in the most diverse animal taxon.

## Introduction

Resolving global patterns of biodiversity is essential for understanding how life is distributed across the world and where it is most important to protect it. As yet, global-scale assessments have largely focused on species richness<sup>1</sup>, phylogenetic diversity<sup>2,3</sup>, species abundances<sup>4,5</sup>, and functional trait diversity<sup>6,7</sup>. These macroecological metrics have long been used to inform conservation and gain insights into mechanisms underlying eco-evolutionary patterns. Only recently, however, have advances in DNA barcoding and metabarcoding been utilized for global studies of biodiversity<sup>8–11</sup>.

Large-scale georeferenced DNA barcode surveys<sup>8,12</sup> have great potential beyond their original use as a tool for assessing biodiversity. They help identify adaptive potential and ecosystem resilience to disturbance<sup>13</sup>, and more generally catalyze understanding of how intraspecific variation correlates with critical ecological functions<sup>14</sup>. DNA barcode surveys provide data for the emerging field of “macrogenetics”,<sup>15,16</sup> which has the potential to inform conservation action<sup>17,18</sup>. Macrogenetic studies summarize the geographic distribution of intraspecific genetic variation across species assemblages to inform conservation strategies and develop hypotheses for the generation and maintenance of biodiversity<sup>19</sup>. While there have been recent arguments that the value of putatively neutral intraspecific genetic diversity is overstated in the context of conservation<sup>20</sup>, a large body of literature indicates otherwise<sup>21</sup>, especially if neutral genetic diversity correlates with adaptive potential<sup>22,23</sup>.

Previous global-scale macrogenetic studies have focused on vertebrate groups, uncovering links between global patterns in aggregated intraspecific genetic diversity, species

richness, and phylogenetic diversity<sup>24,25</sup>, while documenting latitudinal gradients<sup>26–28</sup>.

Macrogenetic studies have also provided mixed support for the influence of human disturbance on genetic diversity<sup>24,26,29,30</sup>, while climate stability<sup>24,30</sup> and species' range sizes<sup>31</sup> have been shown to affect intraspecific genetic diversity on a global scale.

The bias toward vertebrate macrogenetics leaves undocumented the bulk of the planet's animal biodiversity: insects. Insects are vital for maintaining critical ecosystem services and functions<sup>32,33</sup>, yet existing insect macrogenetic studies have been restricted to regional scales due to the immense effort required to collect, identify, and sequence such a species-rich taxon<sup>34–39</sup>. Studies on the resilience of insect communities to global change<sup>40,41</sup>, including biological invasions<sup>42,43</sup>, habitat conversion<sup>44</sup>, and climate change<sup>45</sup> arrive at conflicting conclusions. Here, we present the first global macrogenetic analysis of insects, which is especially timely given increasing evidence that many insect taxa may be in global decline with respect to occurrence, local richness, abundance and biomass<sup>41,46–52</sup>.

Comprehensive knowledge of species diversity, distributions, and population dynamics is largely lacking for large insect groups<sup>53,54</sup>. These constraints on understanding broad-scale insect biodiversity patterns point to a need for systematic global data synthesis<sup>55,56</sup>. Insect species identification is a severe bottleneck constraining large-scale biodiversity surveys that use conventional morphological methods<sup>56–58</sup>. DNA barcoding and metabarcoding are viable approaches for rapid, large-scale, global quantification of insect biodiversity<sup>59</sup>, despite some known limitations<sup>60,61</sup>.

Most macrogenetic studies of animal taxa are based on mitochondrial DNA (mtDNA) sequence data, the most abundant type sequence data in public repositories<sup>15</sup>. These single-locus markers have drawbacks: notably, the genetic diversity that mtDNA captures is from a single draw from the stochastic coalescent process operating within a lineage, and thus may be subject to selection in addition to neutral demographic processes<sup>62–67</sup>. However, the ability to sample the genetic diversity of thousands of taxa per locale outweighs these

theoretical considerations<sup>68,69</sup>. While there are ongoing initiatives to collect and document whole genome data from many taxa, such as the Earth BioGenome Project<sup>70</sup> and GEOME<sup>71</sup>, global sampling will only be achieved at great expense in time and resources.

The Barcode of Life Consortium database (BOLD) is a rich source of single-locus mtDNA that links quality-controlled genetic data with georeferenced metadata<sup>8</sup>. Leveraging this resource, we compiled and analyzed the largest animal macrogenetic dataset ever assembled: over 2.3 million globally distributed and georeferenced mtDNA sequences (*cytochrome c oxidase 1 - COI*) for over 95,000 operational taxonomic units (OTUs) within the class Insecta. We use these data to generate the first global map of insect genetic variation using the commonly used genetic diversity mean (GDM) and a new measure we adapt from macroecology: genetic diversity evenness (GDE). While GDM describes the average genetic diversity among species, GDE represents the evenness of the distribution of individual genetic diversity (GD) measures for all focal taxa that co-occur in a given area<sup>72</sup>. Existing macrogenetic studies, which are inherently correlative, have only described average intraspecific genetic diversity (GDM), and are therefore unable to determine whether high average genetic diversities are due to high diversity within most community members or to the effects of a few taxa with extremely high diversity ([Fig. 1](#); see Methods). The two metrics present complimentary information when considered together, with demonstrated utility in discriminating among possible processes generating natural community assemblages<sup>73</sup>.

We focus our analyses on several questions about the macrogenetics of insects. First, we evaluate whether the magnitude and variability of GD follows latitudinal trends of increasing insect species richness in the tropics<sup>74,75</sup>. The classic latitudinal gradient is often stated in terms of the wet tropics being either “museums” or “cradles” of diversity, with opposite predictions for range sizes<sup>76</sup>. If geographic range size tends to correlate with GD<sup>77</sup>, we might expect this gradient given the “museum” hypothesis, which predicts that taxa in the tropics will be older, and have larger geographic range sizes<sup>78,79</sup>. In contrast, species richness and GD may be

decoupled due to the “cradle” hypothesis that predicts higher speciation rates, more population structure, and smaller range sizes, consistent with Rapoport’s Rule<sup>80</sup>: the tendency for species’ range sizes to increase with increasing latitude<sup>81,82</sup>. Second, we predict that the influence of Late Quaternary climate fluctuations has deflated GD in previously glaciated areas due to recent founder effects associated with expansion from stable Pleistocene refugia<sup>83,84</sup>. Finally, we consider the influence of human disturbance on patterns of assemblage-wide GD, which we expect to decrease the magnitude and evenness of GD in areas of high human influence due to general reductions in abundance with the potential proliferation of disturbance-adapted species<sup>48</sup>.

To answer these questions, we explore how well insect GDM and GDE are predicted by current and historical climate, habitat, and human disturbance. We first find environmental correlates of intraspecific insect genetic diversity globally using Bayesian generalized linear mixed models (GLMM), and then use these to predict patterns of insect GDM and GDE in undersampled regions, which includes most of the planet. In contrast to most documented global vertebrate biodiversity patterns, we find that insect GDE has a latitudinal gradient that peaks in the arid subtropics before steeply declining in higher latitudes and that both GDM and GDE are positively correlated with high temperature extremes.

## Results

GDM and GDE were calculated from insects native to the raster grid cells in which they were sampled at 193 km x 193 km equal-area resolution, for six minimum OTU thresholds (10, 25, 50, 100, 150, 200) to account for the potential impact of sampling biases. These cells were heterogeneously distributed across the globe and on every continent except Antarctica ( $N_{100} = 245$ , [Fig. 2](#), [Supplementary Fig. 1](#)). Genetic diversity patterns and modeling results were mostly consistent across minimum OTU thresholds ([Supplementary Fig. 1](#), [Supplementary Materials](#)).

For conciseness, we highlight results for a minimum OTU threshold of 100, which balanced per-cell and global sampling magnitude with per-cell and global sampling variance (Supplementary Fig. 2). In addition, this threshold resulted in the lowest bias and highest accuracy when predicting trained models to withheld test data (Supplementary Fig. 3). This filtering criterion led to a final dataset that included 2,415,425 COI sequences from 168,894 OTUs sampled across 245 globally distributed grid cells. On average, each cell included ten insect orders, 689 OTUs, and 9,859 individuals. Regions with both high GDM and high GDE (above the 90th percentile) were found in eastern North America, the North American desert southwest, southern South America, southern Africa, and southwestern Australia (Supplementary Fig. 4b). Areas with the lowest values of both observed GDM and GDE were mostly distributed in northern North America and Europe (Supplementary Fig. 4d).

## Insect genetic diversity correlates with latitude

Latitude had a negative quadratic relationship with GDE across the globe at  $\alpha = 0.05$  (spatial modified t-test; Fig. 2; Table 1;  $r_{100} = -0.360$ ;  $p_{100} = 0.022$ ). Latitude was not significantly linearly correlated with GDE ( $p_{100} = 0.064$ ). In contrast to GDE, latitude did not vary significantly linearly ( $p_{100} = 0.924$ ) or quadratically with GDM (Fig. 2; Table 1;  $p_{100} = 0.767$ ).

When considering the top three most sampled orders independently, we found that latitude had a negative quadratic relationship with GDE in Diptera ( $r_{100} = -0.468$ ;  $p_{100} = 0.001$ ) and Lepidoptera ( $r_{100} = -0.360$ ;  $p_{100} = 0.043$ ), but not in Hymenoptera ( $p_{100} = 0.352$ ) (Fig. 3). Latitude did not significantly vary with GDM in all orders (Fig. 3).

## Relationships between insect genetic diversity and the environment

Higher GDE values were associated with areas that rarely freeze ([Fig. 2d](#), [Fig. 4c](#)). To capture this relationship as a binary predictive variable, we divided the globe into areas that do or do not freeze, which is delineated by whether the long-term minimum temperature of the coldest month (MTCM) is above or below 0° C. We found that GDE is significantly higher in areas that do not freeze (spatial modified t-test;  $r_{100} = 0.338$ ;  $p_{100} = 0.013$ ), while GDM was not correlated with this binary metric ( $P = 0.484$ ).

We found that GDM and GDE covary significantly with current and historical climate, and that both are positively correlated with maximum temperature of the warmest month and climate stability variables ([Fig. 2](#), [Fig. 4](#)). We considered 49 environmental variables that could possibly structure the genetic diversity of insect assemblages (Supplementary Table 1). After removing strongly correlated variables ( $r > 0.75$ ), we retained 11 bioclimatic variables describing current climate, variables summarizing climate variation since the LGM (“historical climate”), a habitat heterogeneity metric, a human habitat modification metric, and topographic variables. After removing additional variables that did not contribute substantial predictive power according to projection predictive variable selection (see Methods), we used Bayesian generalized mixed models (GLMMs) that account for spatial autocorrelation in the residuals to explain environmental relationships and make predictions<sup>85</sup>. The resulting GLMMs explained 27.9% of the training data variation in GDM (95% highest density interval (HDI): [14.6%, 40.7%]) and 24.0% of the training data variation in GDE (95% HDI: [10.1%, 39.0%]) ([Fig. 4a,c](#)). When projecting the models to withheld test data (75% training, 25% testing, stratified by continent), we found that predictions for all OTU thresholds were strongly correlated with observed data for

GDE ([Supplementary Fig. 3](#);  $R^2_{100} = 0.515$ ,  $\text{slope}_{100} = 0.961$ ,  $\text{y-intercept}_{100} = 0.019$ ) and GDM ([Supplementary Fig. 3](#);  $R^2_{100} = 0.510$ ,  $\text{slope}_{100} = 1.114$ ,  $\text{y-intercept}_{100} = -0.007$ ).

The GLMM for GDM included eight variables related to current climate: precipitation seasonality, precipitation of the wettest month (PWM), precipitation of the driest month (PDM), maximum temperature of the warmest month (MTWM), and four variables summarizing climate change since the last glacial maximum (LGM): temperature trend, temperature variation, precipitation trend, and precipitation variation ([Fig. 4b](#), [Supplementary Fig. 5](#)). In contrast, the GLMM for GDE only included three variables, all related to current climate: temperature trend, PWM, and MTWM ([Fig. 4d](#), [Supplementary Fig. 5](#)). Notably, predictor variables describing human habitat modification, habitat heterogeneity, and topography did not significantly predict either GD metric ([Supplementary Tables 2 and 3](#))

There was no residual spatial autocorrelation in the final GLMMs (Table 2, [Supplementary Fig. 6](#)), and residual error in test data prediction did not have obvious spatial biases ([Supplementary Fig. 3](#)). All parameter posterior distributions had less than 13% overlap with their prior distributions, indicating high model identifiability ([Supplementary Fig. 7](#)).

## Global predictions of insect genetic diversity

We then used the best-fit GLMM to predict and map the global distribution of GDM and GDE individually and jointly across the globe, including for unsampled areas ([Fig. 2](#), [Supplementary Fig. 8](#)). To prevent model extrapolation into areas of non-analog environments, we omitted predictions in all areas with environmental conditions that fell outside the model training range, including Antarctica, a large portion of northern Africa, the Arabian Peninsula, parts of central Asia, and interior Greenland ([Fig. 2](#); shown in gray; [Supplementary Fig. 9](#)).



Areas predicted to have high levels of both GDM and GDE (above the 90th percentile) include eastern North America, the North American desert southwest, southern South America, southern Africa, and southwestern Australia ([Supplementary Fig. 4a](#); [Fig. 2](#)). Areas predicted to have the lowest GDM and GDE values (below the 10th percentile for both) were found in northern North America and Europe ([Supplementary Fig. 4c](#)). When considered independently, GDM is predicted to be highest (above the 90th percentile) in eastern and southwestern North America, southeastern Asia, southern Australia, northern Madagascar, and southern Argentina ([Supplementary Fig. 4e](#); [Fig. 2](#)), and is predicted to be lowest (below the 10th percentile) for the Nearctic and Palearctic tundra, Europe, Australasia, Central America, the northwest coast of South America, and northern sections of the Amazon ([Fig. 1g](#)). When GDE is considered independently, it is predicted to be the highest (above the 90th percentile) throughout subtropical Australia, the southeastern U.S., the deserts of southwestern US and northern Mexico, the transition between Saharan and sub-Saharan Africa, and South Asia ([Supplementary Fig. 4i](#)). On the other hand, GDE is predicted to be lowest (below the 10th percentile) in Europe and parts of the Nearctic and Palearctic tundra as well as northern Madagascar and a region in central China overlapping the Tibetan plateau ([Supplementary Fig. 4k](#); [Fig. 2](#)). Maps of the upper and lower 95% highest density interval (HDI) predictions are available in [Supplementary Fig. 8](#).

## Taxon-specific patterns of GD

Six insect orders represent 97.2% of all OTUs in this study ([Supplementary Fig. 10](#); [Supplementary Table 4](#)). In order of prevalence, they include Diptera, Lepidoptera, Hymenoptera, Coleoptera (the four mega-diverse orders that include *ca.* 80% of known insect species), Hemiptera, and Trichoptera. The remaining 2.8% of OTUs belong to 20 additional insect orders. Although Coleoptera has more described species than the other three

megadiverse orders, it comprises less than 10% of OTUs represented in the data, possibly due to the common practice of using Malaise traps in flying insect surveys, where Diptera and Hymenoptera dominate sampling<sup>86</sup>. Across orders, 74.7% of all OTUs occupied a single grid cell with less than one percent occupying more than 11 grid cells (Supplementary Fig. 11)

To investigate the influence of the three most prevalent orders (Diptera, Lepidoptera, and Hymenoptera, 84.2% of total) we removed these orders from the full dataset and reanalyzed patterns of GDE and GDM. Using Welch's unequal variance t-tests, we found no significant difference in GDE estimates between the full dataset and the dataset with the most prevalent outliers removed ([Supplementary Fig. 12](#);  $p_{100} = 0.065$ ). However, GDM was slightly but significantly lower in the full dataset ( $\text{mean}_{\text{diff}} = -0.004$ ,  $\text{df} = 122.44$ ,  $P < 0.001$ ).

OTU sampling across the most abundant three orders varied geographically (Supplementary Fig. 13). When we calculated OTU sampling as the number of OTUs per order within each cell, Diptera dominated OTU sampling towards the far northern latitudes, while Lepidoptera dominated sampling south of these far northern latitudes, from North America and Europe towards the equator, and Hymenoptera typically accounted for fewer than 50% of OTUs sampled, with overrepresented sampling in Madagascar ([Supplementary Fig. 13](#)).

## Discussion

We found a surprising quadratic latitudinal gradient in genetic diversity evenness (GDE), which peaks at subtropical latitudes, and decreases near the equator and towards the poles ([Fig. 2](#)). This relationship is significant for GDE, with a peak that corresponds to arid subtropical areas, while GDM does not significantly vary with latitude. Although our approach is correlative and thus not as suitable as simulation models for direct inference of processes<sup>87</sup>, these results suggest that forces underlying intraspecific genetic diversity are inherently different from those driving the classical negative latitudinal gradients in species richness and phylogenetic diversity

found in most arthropod taxa, including ants, butterflies, and spiders<sup>88,89 90–92</sup>, as well as plants<sup>93</sup>, which are expected to be strongly linked to insect biogeographic patterns. Bees (order Hymenoptera) may be a notable exception, as current estimates show a latitudinal gradient similar to GDE with highest richness at mid-latitudes<sup>94</sup>. However, when we fit quadratic correlations to the three most common orders separately, Hymenoptera was the only taxon with GD metrics that did not match the general trend (Fig. 3). The negative quadratic latitudinal correlation of GDE and the lack of a correlation with GDM suggests a departure from expectations of species genetic diversity correlation (SGDC) predictions<sup>35,95–97</sup>. However, many confounding factors could affect how species diversity metrics relate to GDM and GDE, and these factors may have both positive and negative effects, leading to large variation in the direction and strength of SGDCs<sup>98</sup>, especially at a global scale in such a large taxonomic group such as insects. Sampling biases, especially for the overrepresented North American and European regions, may also influence this relationship, although we find no evidence of a correlation between sampling effort and the two GD metrics in our data (Supplementary Fig. 14, Supplementary Table 5). Moreover, both metrics are calculated using mtDNA, which is a single, non-recombining locus that is likely shaped by demographic history and selection<sup>67,99</sup>. While intraspecific mtDNA diversity data is insufficient for making detailed inference of demographic history or phylogenetic reconstruction<sup>67</sup>, we instead treat it as an important variable to study at the macroscale, rather than as a population genetic marker. Macrogenetics is a relatively new field and thus basic expectations regarding observed patterns are still not established. Our study is a step in the direction of establishing this foundational knowledge and suggests avenues for ways to test specific hypotheses.

The latitudinal gradient of GDE peaking in the subtropics also contrasts with recent macrogenetic studies of vertebrates, all of which find a negative latitudinal gradient of average genetic diversity peaking in the tropics and declining poleward, including mammals<sup>20</sup>, amphibians<sup>26</sup>, and fishes<sup>100</sup>. Why would GDE be lower in areas like the wet tropics when the

species diversities of most insect groups reach their peaks in these habitats<sup>101,102</sup>? Rapoport's Rule, the tendency for species' range sizes to increase with increasing latitude<sup>81,82</sup>, might partially explain this result because species with larger ranges tend to harbor greater genetic diversity<sup>77,103</sup>. This expectation has recently been empirically observed<sup>31</sup>, as well as investigated in a theoretical macrogenetic context whereby GD relates to species' ranges following a power law<sup>104</sup>. Assuming that Rapoport's Rule is a general tendency in the two large insect orders Diptera and Lepidoptera, sampled coalescent times among sampled individuals within larger ranged subtropical species are expected to be older and to yield consistently higher values of GD that aggregate to higher GDE within grid cells<sup>105</sup>. This is especially likely if species' ranges are larger than the 193 x 193 km grid-cells we chose and if subdivision exists within the range of a species<sup>106,107</sup>. The inflation of GD from large-ranged species in the assemblage results in more even and generally higher genetic diversities and is reflected in the positive correlation between GDE and GDM (Fig. 2d,e). However, we do not find a relationship between GDM and latitude.

We are hypothesizing that both larger ranges and climatic stability could have a positive effect on GD, yet they are different processes and do not necessarily co-occur. For example, a climatically stable area might also coincide with small and variable range sizes, and conversely an area that experiences cycles of glaciation may also coincide with many large ranged species. But in both cases, GD is predicted to be deflated. Only for those areas with many large ranged species occupying relatively stable climates does one predict elevated GD consistently across species to yield higher values of both GDE and GDM. Additionally, we find that OTUs occupy more grid cells between 40° and 60° latitude ([Supplementary Fig. 14](#)), matching our expectation for larger ranges at higher latitudes, although we acknowledge that sampling bias may contribute to this pattern as well.

If larger ranges correspond to OTUs found in more than one grid cell in the higher latitude areas, and this in turn affects GDE in aggregate samples, it could be that the observed

peak in GDE is partially driven by processes related to geographic patterns in physiological tolerances that affect the size of a species range. Wide-ranging extratropical insect species can usually tolerate a broader range of climatic variation, whereas limited-range tropical insect species tend to have a narrow climatic niche, stronger habitat specializations, and narrower physiological tolerances<sup>108</sup>. Insect diapause is thought to provide this adaptive tolerance to wider abiotic conditions and may result in larger and more uniform range sizes across an assemblage<sup>108,109</sup>. The positive relationship between range size and GD<sup>77,103</sup> provides a possible mechanistic relationship that connects Rapoport's Rule and the more uniformly high genetic diversities found in the subtropics. In this case, increasing GDE with latitude may be driven by uniformly larger range sizes that result from greater physiological tolerances in harsher environments. While this is consistent with both GDM and GDE being most strongly associated with the seasonally hot conditions (MWTM) found in the subtropics (Fig. 4), this relationship drastically breaks down in the colder temperate and subarctic regions (Fig. 2) that frequently freeze, especially for GDE (Fig. 4).

Could it be that the uniformity of larger range sizes (and corresponding genetic diversities) decline in these colder regions because insect species that enter diapause in habitats that seasonally accumulate substantial snow are likely to encounter less extreme temperatures than those in more exposed habitats such as subtropical deserts<sup>110</sup>? This is not likely, as there is no evidence that the range sizes of insect species become smaller in areas that experience frequent freezing, and it is much more likely that the steep decline in GDE in these areas stems from late-Pleistocene glacial cycling. In this light, we might predict more uniform and higher levels of GD in subtropical and temperate arid regions that have both high climatic variability and seasonality and were not glaciated during the LGM.

Indeed, our finding of lower GDE in areas that were glaciated or tundra during the LGM is less surprising in the context of the predictions of species that expanded poleward from Pleistocene refugia with lower GD values arising from founder expansion dynamics<sup>111–113</sup>. While

a significant poleward decline is found only in GDE, with the decline in GDM being apparent at extreme latitudes but not significant, this arises from a large number of zero GD OTUs that are co-distributed with a small number of hyper-diverse OTUs in these northern regions. Indeed, this pattern is largely consistent with a gradient of lower haplotype richness in recently unglaciated areas found in European butterflies<sup>34</sup> based on the same *COI* data from BOLD used here. Similarly, aquatic insect species have lower intraspecific genetic diversities in recently deglaciated areas of Europe compared to Neotropical areas<sup>36</sup>, as does an assemblage of *Anopheles* taxa co-distributed across the Indo-Burma biodiversity hotspot<sup>114</sup>.

In contrast to the declines of GDE in previously glaciated areas, it could be that the peak of GDE in the subtropics, and more generally the correspondence of GDM and GDE with seasonally high temperatures, is the result of climates which have remained stable since the LGM ([Fig. 4](#)). Moreover, GDM and GDE have contrasting relationships with seasonally high precipitation (PWM), where GDM increases with PWM, while GDE decreases, corresponding with inflated GDE in arid, hot regions rather than the wet tropics ([Fig. 2.4](#)).

The regions predicted to have higher and more uniform GD correspond with some known hotspots of insect biodiversity. For instance, the deserts of southwestern US and northern Mexico have the highest butterfly phylogenetic endemism in North America<sup>94,115</sup>. Southwestern Australian deserts also have exceptionally high arthropod endemism<sup>116</sup>, and are among the original biodiversity hotspots identified by Myers et al.<sup>117</sup>. One possible explanation is that these areas are more climatically stable and hence may harbor more uniform demographics that manifest as elevated GDE values. However, much of the global pattern in GDE that we find is dominated by Diptera and Lepidoptera ([Fig. 3](#)). Therefore, we caution against making broad generalizations about such a broad taxonomic group.

Areas with higher levels of GDE could also partially emerge from different levels along the continuum of fundamental community assembly processes<sup>118</sup>. Although the spatial scale is not always in line with the grid-cells we employ, Overcast et al.<sup>73</sup> found in simulated and

empirical (arthropod, annelid, and trees) communities to have elevated GDE under ecologically neutral conditions in contrast to non-neutral, or “niche-structured”, conditions. In these specific model-dependent cases, the lower GDE in communities assembled via environmental filtering is likely caused by increased genetic diversity in hyper-dominant species with stronger local ecological adaptation. In line with the process-explicit modeling, our observation of GDE increasing from the tropics to the subtropics shows that equatorial insect communities may have stronger local niche-structured mechanisms (i.e., less ecologically neutral conditions) than subtropical temperate insect communities. This would be consistent with the idea of stronger niche conservatism in the tropics.<sup>119</sup>

While this is one of many hypotheses emerging from our study, the correlative approaches we use are a crucial first step to developing a better understanding of the processes underlying biodiversity. To more directly test such hypotheses, process-explicit models will be required to uncover causal processes that drive the structure of genetic diversity as well as discriminate among the processes that do not<sup>120,121</sup>. These models will be especially valuable in revealing the underlying mechanisms of unexpected correlations found here and in other macrogenetic studies<sup>122</sup>.

Genetic diversity is critical to the survival of insects and their complex interactions with other organisms<sup>123–125</sup>. High genetic diversity may facilitate adaptation to changing climates, emerging diseases, and pollutants: three (of many) potential drivers of the “insect apocalypse”<sup>50</sup>. In addition, genetic diversity contributes to the diversity and stability of species interaction networks by affecting niche space and competition<sup>126</sup>, community structure<sup>127</sup>, and network complexity<sup>128</sup>. At larger ecological scales, insect genetic diversity may reflect ecosystem function and structure as reliably as other traditional macroecological metrics such as species richness<sup>129</sup>. It can also augment the resilience of ecosystems that provide continuing services for humankind<sup>14</sup>, such as disease management, curbing the spread of invasive plants, aiding sustainable agriculture, pollinating food crops, and controlling pests<sup>13</sup>. While the metric of global

human modification we considered did not significantly correlate with GDM or GDE, there are many facets of anthropogenic disturbance acting at different spatial scales that are difficult to summarize in a single metric<sup>130</sup>. For well-studied systems, shifts in GDM and GDE may reflect the loss of rare species with less genetic diversity or community shifts toward wide-ranging taxa, including invasive species, and could thus be used in long-term monitoring schemes<sup>131,132</sup>. Although large-scale data curation efforts are underway<sup>133</sup>, the spatiotemporal resolution of genetic sampling currently available does not permit rigorous assessment of how humanity affects insect GD at a global scale, but a concerted increase in sampling effort, especially in the data-poor regions we identify, will likely make this feasible in the not-too-distant future.

By modeling relationships between environmental data and two complementary measures of intraspecific genetic diversity, GDE and GDM, we can make assemblage-level genetic diversity predictions for data-poor regions of the planet, while flagging and masking those with high uncertainty<sup>134</sup> (Fig. 2). These genetic diversity maps have the potential to fill a knowledge gap that far exceeds the undersampling and taxonomic uncertainties underlying vertebrate and plant macroecological studies<sup>135,136</sup>. They can also highlight genetic diversity as an important biodiversity component that has yet been assessed for relatively few taxa<sup>17</sup>, while focusing attention on a data-deficient group with evidence of global population declines and strong connections to ecosystem functions and services<sup>137</sup>. Taken together, GDM and GDE are fundamental biodiversity metrics for documenting and understanding “the little things that run the world”<sup>138</sup>.



# Methods

## Aligning and filtering sequence data

The barcoding region of the mitochondrial locus *cytochrome c oxidase 1 (COI)* was selected as a genetic marker that can be deployed to study genetic diversity at the macrogenetic scale. We downloaded *COI* mitochondrial sequence data for insects directly from the BOLD webpage using the application programming interface (<http://www.boldsystems.org/index.php/resources/api>; downloaded 19 Nov 2019). Our initial database comprised 3,301,025 complete insect records before applying a series of quality filters. We used the BOLD database's OTU assignments (termed barcode identification numbers; BINs), which cluster similar sequences algorithmically and map them against the BOLD database<sup>139</sup>. After trimming end gaps from sequences, we removed exceptionally long sequences (>800 base pairs, bp) which contained a large proportion of gaps that negatively impacted alignments and the calculation of summary statistics. In addition, we removed shorter sequences (<400 bp) that the BOLD database uses for BIN identification and may downwardly bias GD estimates. We only retained COI sequences from georeferenced specimens. Sequence alignments were independently performed for each OTU within single sampled geographic raster cells, *i.e.*, grid cells. We used default settings in Clustal Omega (v1.2.3) to align the sequences and visually assessed both a random subset of alignments and alignments with genetic diversity values at the tails of the distribution to check for alignment errors<sup>140</sup>.

To reduce the potential impact of invasive species on our analyses, we removed trans-continental invasive species from the dataset using a list of invasive insect species compiled from seven resources: Global Insect Species Database, [<http://www.issg.org/database>; accessed 23 May, 2020]; Invasive Species Compendium

[<https://www.cabi.org/isc/>; accessed 24 May, 2020]; Center for Invasive Species and Ecosystem Health [<https://www.invasive.org/>; accessed 24 May, 2020]; Invasive Alien species in South-Southeast Asia <sup>141</sup>; Japan Ministry of the Environment [<https://www.env.go.jp/en/nature/as.html>; accessed 24 May, 2020]; European Alien Species Information Network [<https://easin.jrc.ec.europa.eu/easin/Home>; accessed 24 May, 2020]. We identified all species and OTUs present on multiple continents and removed those on the invasive species list from our dataset. While some invasive species may be restricted to single continents, removal of such taxa was not possible given the lack of information on changes in insect range boundaries and species assignments.

## Calculating the evenness and mean of genetic diversity (GDE and GDM)

Previous global macrogenetic studies focused on spatially defined metrics that summarize genetic diversities calculated across all species sampled from an area of arbitrary spatial resolution <sup>19,142</sup>. This is most commonly the average genetic diversity or, alternatively, a measure of the allelic richness derived from the total number of unique and/or common alleles of a genetic locus across all taxa within an area <sup>143</sup>. We used two distinct summaries of the former measure of genetic diversity (GD) - the mean (GDM) and evenness (GDE) of genetic diversity per unit of area. To obtain the GD for each OTU per grid cell, we calculated the average number of nucleotide differences across all pairwise sequence comparisons per OTU per base pair <sup>105,144</sup> (a.k.a. nucleotide diversity). Aggregated across OTUs within each grid cell, GDM is then defined as the average GD among OTUs in each grid cell, following Theodoridis et al. <sup>24</sup>. Because the distribution of GDM at the grid cell scale was highly skewed towards zero, we performed a square-root transformation to achieve a more normal distribution, consistent with

Theodoridis et al.<sup>24</sup>'s approach. All subsequent statistical analyses of GDM at the grid cell scale were based on the transformed GDM.

While GDM is a standard metric in the macrogenetic toolbox, GDE is derived from a set of metrics often used in ecological studies of biodiversity. Hill numbers permit direct comparisons of diversity across scales and data types<sup>145–147</sup>. GDE is then defined as the first-order Hill number of GD across OTUs per grid cell, corrected by sampled OTU richness<sup>73</sup>:

$$\frac{\exp(\sum_{i=0}^N -\pi_i \ln(\pi_i))}{N}$$

Where  $N$  is the number of OTUs in the assemblage and  $\pi_i$  is the GD for a single OTU. Correcting for sampled OTU richness allows for comparison across assemblages of different numbers of OTUs. The numerator of this metric is the exponential of Shannon's diversity index, which is also referred to as Shannon's information measure or Shannon's entropy in the literature<sup>148</sup>. It is commonly used to describe evenness and variability of species abundances<sup>149,150</sup>, and here we adapt it to do the same for genetic diversities calculated from all species sampled from a particular area.

High values of GDE indicate areas where most OTUs have a similar GD ([Fig. 1](#)), whereas lower GDE arises when GD values across the community diverge considerably<sup>149</sup>. The distribution of GD values within an area of low GDE can take a variety of shapes, but the most common in our observed data is markedly L-shaped whereby most OTUs have low or zero GD along with a small number of OTUs with large GD ([Fig. 1d](#)).

## Spatial resolution and sampling decisions

To assess how the spatial scale and density of OTU sampling impacted our results and to establish a sampling strategy that maximizes the amount of information, we calculated both

metrics at 1) three different spatial resolutions, and 2) six different thresholds of minimum OTU sample sizes per grid cell. The spatial resolutions include 96.5 km x 96.5 km, 193 km x 193 km, and 385.9 km x 385.9 km equal-area grid cells using a Behrmann cylindrical equal-area projection, which are 1°, 2°, and 4° longitude at 30°N. We considered a minimum of 10, 25, 50, 100, 150, or 200 unique OTUs per grid cell. We chose the spatial resolution that balanced the average number of OTUs per grid cell, the number of grid cells, the average number of taxonomic orders per grid cell, and variation in the number of OTUs across grid cells ([Supplementary Fig. 2](#)). After choosing an appropriate spatial resolution for our analysis, we performed the modeling procedure outlined below for all minimum OTU thresholds. While retaining results across the range of minimum OTUs per grid cell, we focus our analysis using the threshold that results in the least-biased and most precise estimates of GD when predicting a trained model onto withheld test data. With respect to numbers of sampled allele copies per OTU, we used a minimum of three individuals per OTU per grid cell. This is a sensible approach to estimate GD while still maximizing data use because BOLD data submissions may omit duplicate alleles and coalescent theory suggests that using average pairwise distance from 5-10 samples per OTU provides estimates of genetic diversity that are as reliable as those obtained from hundreds of samples<sup>105</sup>. To explore this sampling dynamic explicitly, we conducted coalescent simulation experiments comparing how the calculation of GD varies given identical samples with and without duplicate alleles removed. These simulations showed that retaining only unique haplotypes resulted in a small, consistently upward bias in GD values. Additionally, increasing values of effective population size ( $N_e$ ) decreased this bias, with estimates of GD with and without duplicate alleles converging for  $N_e$  values greater than  $\sim 10e5$  ([Supplementary Materials, Supplementary Fig. 15](#)).

Because 97.2% of OTUs are represented by six taxonomic orders ([Supplementary Fig. 10](#); [Supplementary Table 4](#)), with 84.2% represented by three (Diptera, Lepidoptera, and Hymenoptera), we investigated whether and to what degree over-represented orders might be

driving the signal of GDE and GDM. We compared the global frequency distributions of per-cell GDM and GDE with these three orders removed with the distribution of these summary statistics for the entire data set. The distributions of per-cell GDE and GDM between these filtered data sets and the original data set were compared using Welch's unequal variance t-tests<sup>151</sup>. In addition, we mapped the observed distribution of GDM and GDE for the three orders to compare their geographical variation in GD with the full data sets.

Although coalescent theory predicts that the number of allele copies per OTU per grid cell will have a limited impact on the per OTU genetic diversity<sup>105</sup>, we examined whether this assumption was met in the data by testing for Pearson's correlations between the per OTU GD and number of individuals per OTU. The relationship was statistically significant, but extremely weak ( $r_{100} = 0.029$ ,  $p_{100} < 0.001$ ). Similarly, to investigate whether per grid cell sampling, *i.e.*, total number of individuals, number of individuals per OTU, and number of OTUs per cell, had an effect on GDE or GDM, we tested for Pearson's correlations between these quantities (no relationship, all  $P > 0.20$ , Supplementary Table 5; Supplementary Fig. 16). We also assessed sampling variation by taking the ten most sampled grid cells (2,748 to 13,300 OTUs per grid cell) and obtaining sampling distributions of GDM and GDE for each by resampling with replacement 100 OTUs per sample ( $N = 1000$  resamples) and calculating the summary statistics for each resample (Supplementary Fig. 17). Finally, we considered the spatial distribution of OTUs by visualizing the distribution of the number of grid cells occupied by each OTU.

## Environmental variable selection

We aggregated a total of 49 abiotic, biotic, and anthropogenic variables that potentially influence intraspecific genetic diversity in insect communities (Supplementary Table 1). We removed highly correlated variables ( $r > 0.75$ ), prioritizing variables that represent climate extremes,

climate variability, habitat variability, last glacial maximum (LGM) climate stability, and human influence on the environment.

We retained a final data set of 11 ecologically relevant variables: five bioclimatic variables, habitat heterogeneity, global human modification, and four metrics of climate stability (temperature and precipitation) since the LGM (Supplementary Table 1). The five bioclimatic variables describe climate extremes and variability, and were obtained from the CHELSA database<sup>152</sup>. They include maximum temperature of the warmest month (MTWM), minimum temperature of the coldest month (MTCM), precipitation of the wettest month (PWM), precipitation of the driest month (PDM), temperature seasonality, and precipitation seasonality<sup>152,153</sup>. The habitat heterogeneity metric was calculated as the standard deviation of the Enhanced Vegetation Index, which was derived from the Moderate Resolution Imaging Spectroradiometer (MODIS) (2.5 arc-min; <sup>154</sup>). The human modification variable is a cumulative measure of human modification to terrestrial areas<sup>155</sup>. Measures of both the historical trend and variability of temperature and precipitation over the last 21,000 years were obtained from<sup>24</sup>. The specific definitions of these derived metrics include “deep-time climate trend”, the change in climate within each century, averaged across centuries, and “deep-time climate variability”, meaning the standard deviation around the change in climate, averaged across centuries. Low deep time trend values indicate regions with long-term climate stability, while low variability values indicate regions with short-term climate stability. Each variable was aggregated from its original resolution (see Supplementary Table 1) to 193 km by 193 km resolution through bilinear interpolation.

In addition, we explored the relationship between GDE and GDM and a binary variable delineating the globe into areas that do or do not freeze, which is delineated by whether the long-term minimum temperature of the coldest month (MTCM) is above 0° C versus below 0° C. These regions correspond with sharp community turnover in birds<sup>156</sup> and could correlate with critical life processes for insects.

## Modeling approach

We applied a Bayesian modeling approach to identify the environmental conditions that best explain the global distribution of GDM and GDE in insects. We independently modeled the relationship between the set of 11 uncorrelated, ecologically relevant variables (see above) and per grid-cell GDM and GDE values. To assess the predictive ability of the model, we split the data set into 75% training and 25% testing sets, stratifying the sampling by continent to maximize spatial representation of sampling in both data sets. All model selection and model fitting was performed on the training set, while predictive performance of the best fit model was assessed by predicting the withheld test data set.

We prioritized constructing a simple, interpretable linear model that predicts GDM and GDE across the globe by first reducing the number of potential variable combinations, followed by a Bayesian hierarchical generalized linear mixed model (GLMM) approach that accounts for spatial autocorrelation<sup>85</sup>. We reduced the number of potential predictor variable combinations from the set of 11 variables with low collinearity using Bayesian regression coupled with projective prediction feature selection. This approach minimizes the number of variables in a simple model while retaining comparable predictive power to a model that includes the full suite of predictor variables<sup>157, 158</sup>. For each model we used regularizing priors on all slope parameters ( $N(0, 0.1)$ ) and the error term ( $N(0, 1)$ ). We centered and scaled all variables to a standard deviation of 1 and mean of 0 prior to modeling.

If residual spatial autocorrelation (SAC) is present, the assumption of independent and identically distributed residuals would be violated, resulting in potentially biased overprecision of parameter estimates<sup>159</sup>. We tested for SAC in the residuals of the resulting simplified models using Moran's  $I$  and 10,000 simulations implemented in the R package *spdep* v1.1-2<sup>160</sup>. We detected significant levels of SAC in the residuals of our GDE model (Moran's  $I = 0.149$ ,  $P = 0.008$ ) and our GDM model (Moran's  $I = 0.306$ ,  $P < 0.001$ ).

Given this presence of SAC, we used a Bayesian generalized linear mixed-effects model (GLMM) implemented in the R package *glmmfields* v 0.1.4 to model the relationship between the variables and the two GD metrics (GDE and GDM) while accounting for SAC<sup>85</sup>. SAC is modeled as a random effect with a multivariate t-distribution determining the shape of the covariance matrix. Model parameters were estimated from the posterior distribution using a No U-Turn Sampler<sup>161,162</sup>. Further model specifications are provided in the Supplementary Materials. We again tested for SAC in the residuals of these models using the same approach as above. The proportion of variance explained by the models were assessed with Bayesian R<sup>2</sup><sup>163</sup>, modified to account for spatial autocorrelation error. After selecting a model, we used the percentage of prior-posterior overlap to assess the identifiability of parameter estimates relative to the information provided by their prior distributions<sup>164</sup>. Low overlap between the prior and posterior distribution of a parameter indicates that there is sufficient information in the data to overcome the influence of the prior.

We tested for the statistical significance of a linear or quadratic relationship between latitude and GDM and GDE while accounting for spatial autocorrelation using a modified t-test of spatial association, implemented in the R package *SpatialPack* v0.3<sup>165,166</sup>. This was done for the full data set and independently for the three most sampled orders. We also independently tested the effect of whether an area freezes or not on the two GD metrics using the same modified t-test of spatial association.

## Global genetic diversity map generation

Using the final models of GDM and GDE, we created maps of the global distribution of insect GD. We used 1000 draws from the posterior distribution to predict terrestrial environments across the globe. We included all continents except Antarctica, which had no observed data and included environments far more extreme than the observed data. We



created maps of the median predicted GDM and GDE, along with the upper and lower 95% HDI. In addition, we created bivariate color maps of these prediction intervals for combined GDM/GDE to highlight areas where GDM and GDE vary in similar and different directions.

To avoid making poor predictions into areas with environments that are non-analogous to the areas used to train the models, we used multivariate environmental similarity surface (MESS) maps ([Supplementary Fig. 9](#)). MESS maps visualize how environmentally similar or different areas across the globe are compared to the model training data<sup>167</sup>. Subsequently, we used the MESS results to mask areas with non-analogous environmental space (values less than 0) on our global prediction maps, indicating areas with high prediction uncertainty.

## Data availability

All geographic and genetic sequence data, in addition to raw model output, are available at **figshare\_link (will make available upon acceptance)**. All environmental data are publicly available and links are provided in Supplementary Table 1.

## Computer code

All code used for data processing and analysis is available at <https://github.com/connor-french/global-insect-macrogenetics>. A code snapshot is available at **figshare\_link**.

# Figures

Fig. 1

Diagram illustrating genetic diversity mean (GDM) and genetic diversity evenness (GDE). A local assemblage (c) is a set of operational taxonomic units (OTUs, analogous to species) sampled from a single grid cell that are a subset of a wider regional pool with evolutionary relationships shown in (a). OTUs have varying amounts of genetic diversity (GD), represented by blue circles with sizes corresponding to magnitude of GD. Longer branches among individuals within an OTU indicate a longer time to coalescence and therefore higher GD (b). Panel (c) illustrates four local assemblages sampled from four different grid cells from the same regional pool. The first local assemblage in (c) has high GDM and high GDE, represented by OTUs with high and similar GD and a corresponding relatively flat curve on the rank plot in (d). The second local assemblage in (c) has the same high GDM as the first assemblage in (c), but has lower GDE, indicated by dissimilar circle sizes and a steeper curve in the corresponding rank plot in (d). The third and fourth local assemblages in (c) have the same GDE as the first and second assemblages respectively, but have lower GDM, indicated by the smaller circle sizes and lower height curves on the rank plots in (d). This illustrates the complementary nature of the two metrics, where GDM describes the average magnitude of GD in a local assemblage, while GDE describes the distribution of GD in that same local assemblage.

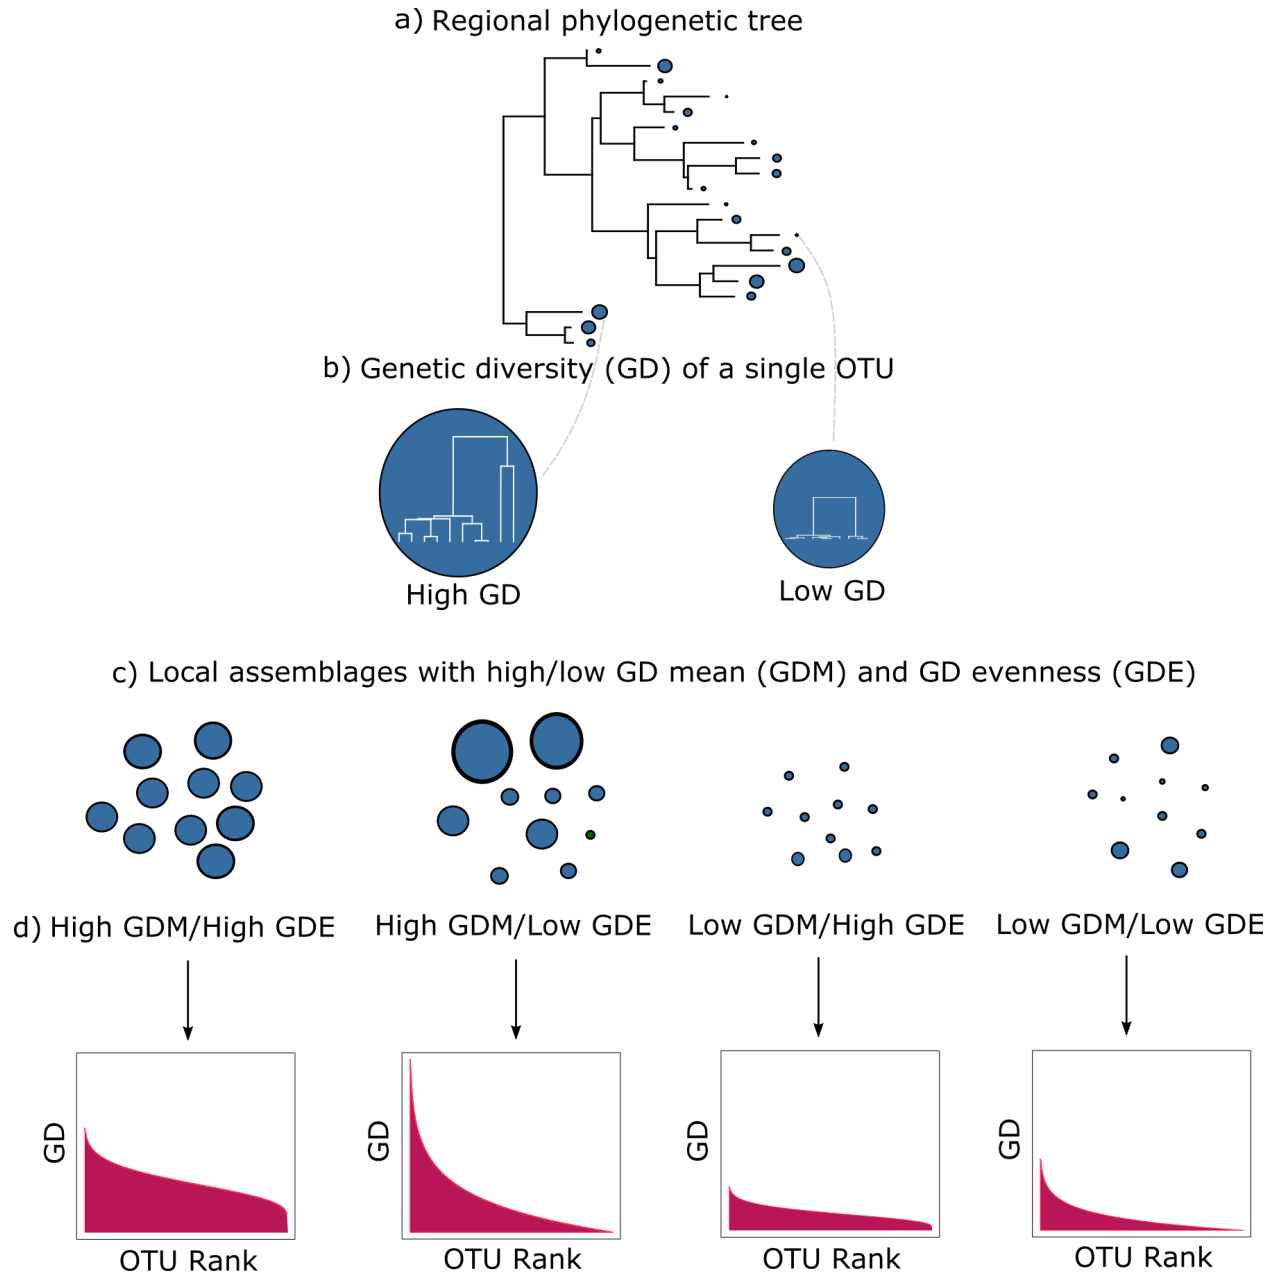

## Fig. 2

The observed (a, c, e) and projected (b, d, e) distributions of genetic diversity mean (GDM) (a, b), evenness (GDE) (c, d), and their composite (e, f) across the globe. Values for the projected maps were derived from a spatial Bayesian generalized linear mixed model model with environmental predictor variables. For GDM (b), the best fit model included MTWM and precipitation seasonality, while for GDE (d), the best fit model included MTWM, temperature seasonality, and PWM. Latitudinal trends in GDM (a) and GDE (c) are included as insets of the observed maps, where latitude had no significant relationship with GDM and a negative quadratic relationship with GDE (spatially modified t-test, Table 1). The yellow lines drawn across the maps of GDE (c, d) delineate areas that do or do not freeze, where areas north of the line and inside the polygon in South America have minimum temperatures that dip below 0°C, and areas south of the line and outside the polygon have minimum temperatures that remain above 0°C year-around. Areas that do not freeze on average have higher GDE than those that do freeze. We masked in gray areas with environments non-analogous to the environments used for modeling. MTWM = maximum temperature of the warmest month; PWM = precipitation of the wettest month.

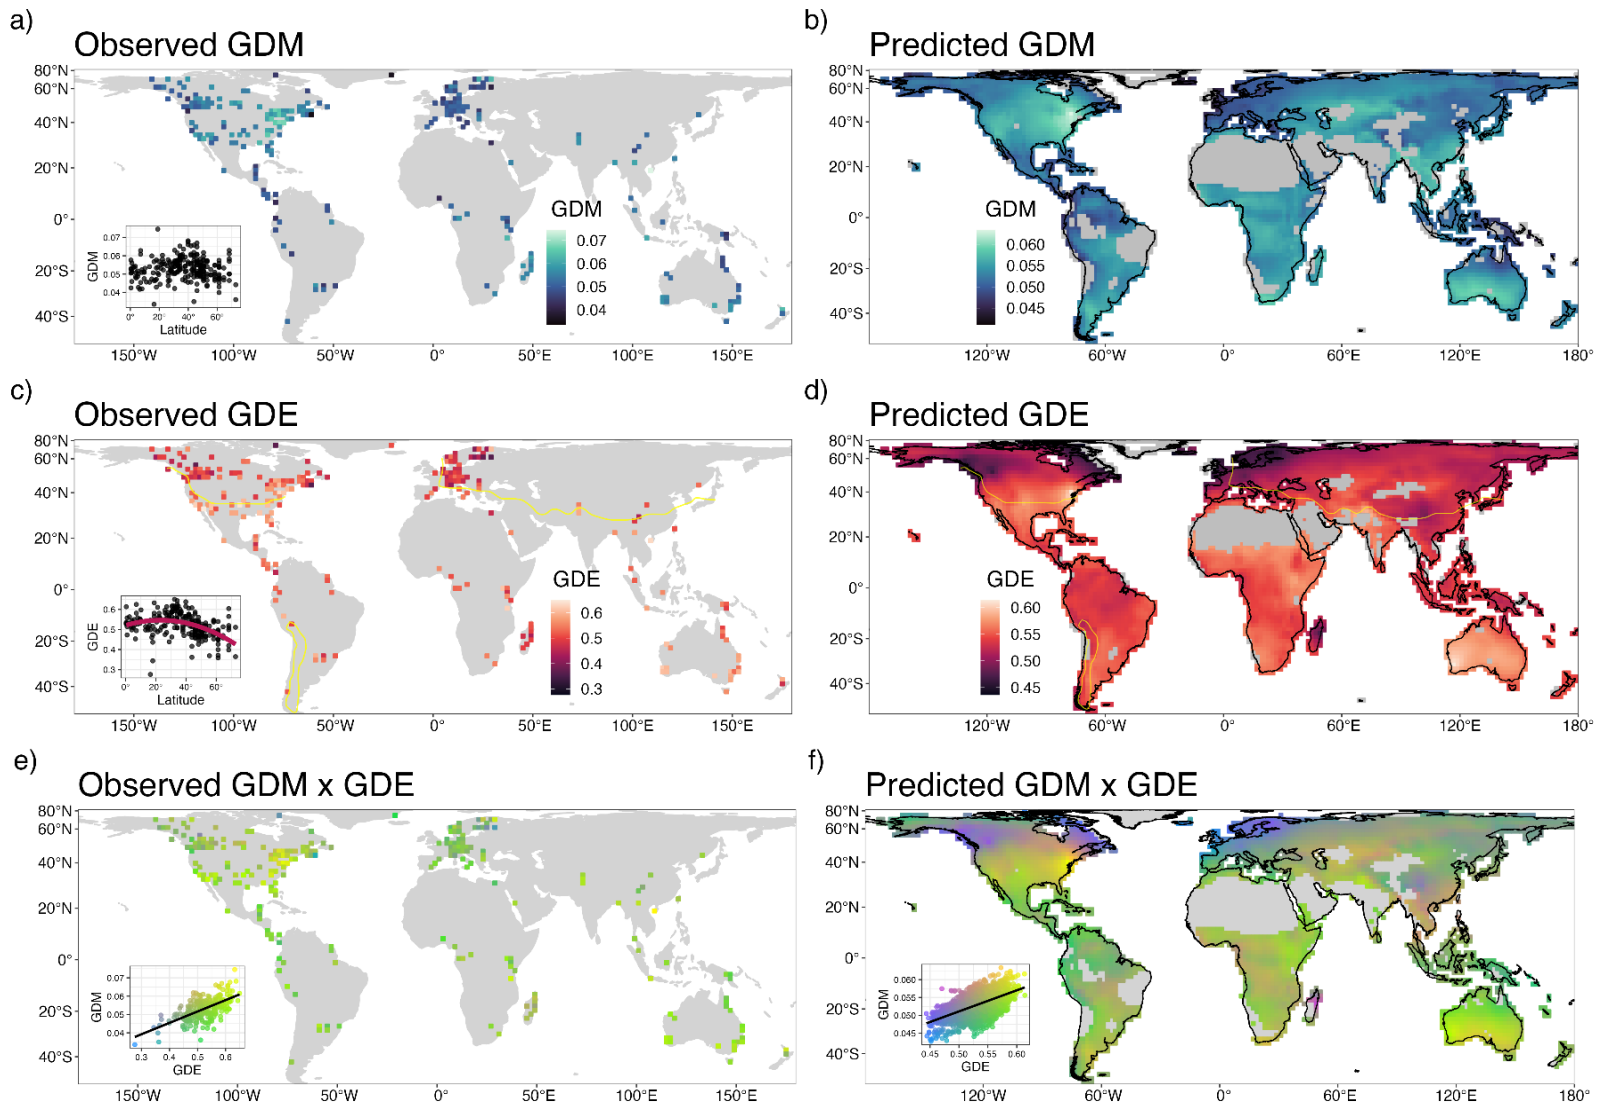

Fig. 3

The observed distributions of genetic diversity mean (GDM) (a, c, e) and evenness (GDE) (b, d, f) for the top three most sampled taxa, Diptera (a, b) (34.0% of OTUs), Lepidoptera (c, d) (32.4%), and Hymenoptera (e, f) (17.3%). The same filtering criteria were applied here as in the full analysis, where only cells with at least 100 OTUs and at least three sequences per OTU were considered. Latitude did not significantly vary with GDM for all orders (spatially modified t-test), but did vary with GDE for Diptera (b) and Lepidoptera (d).

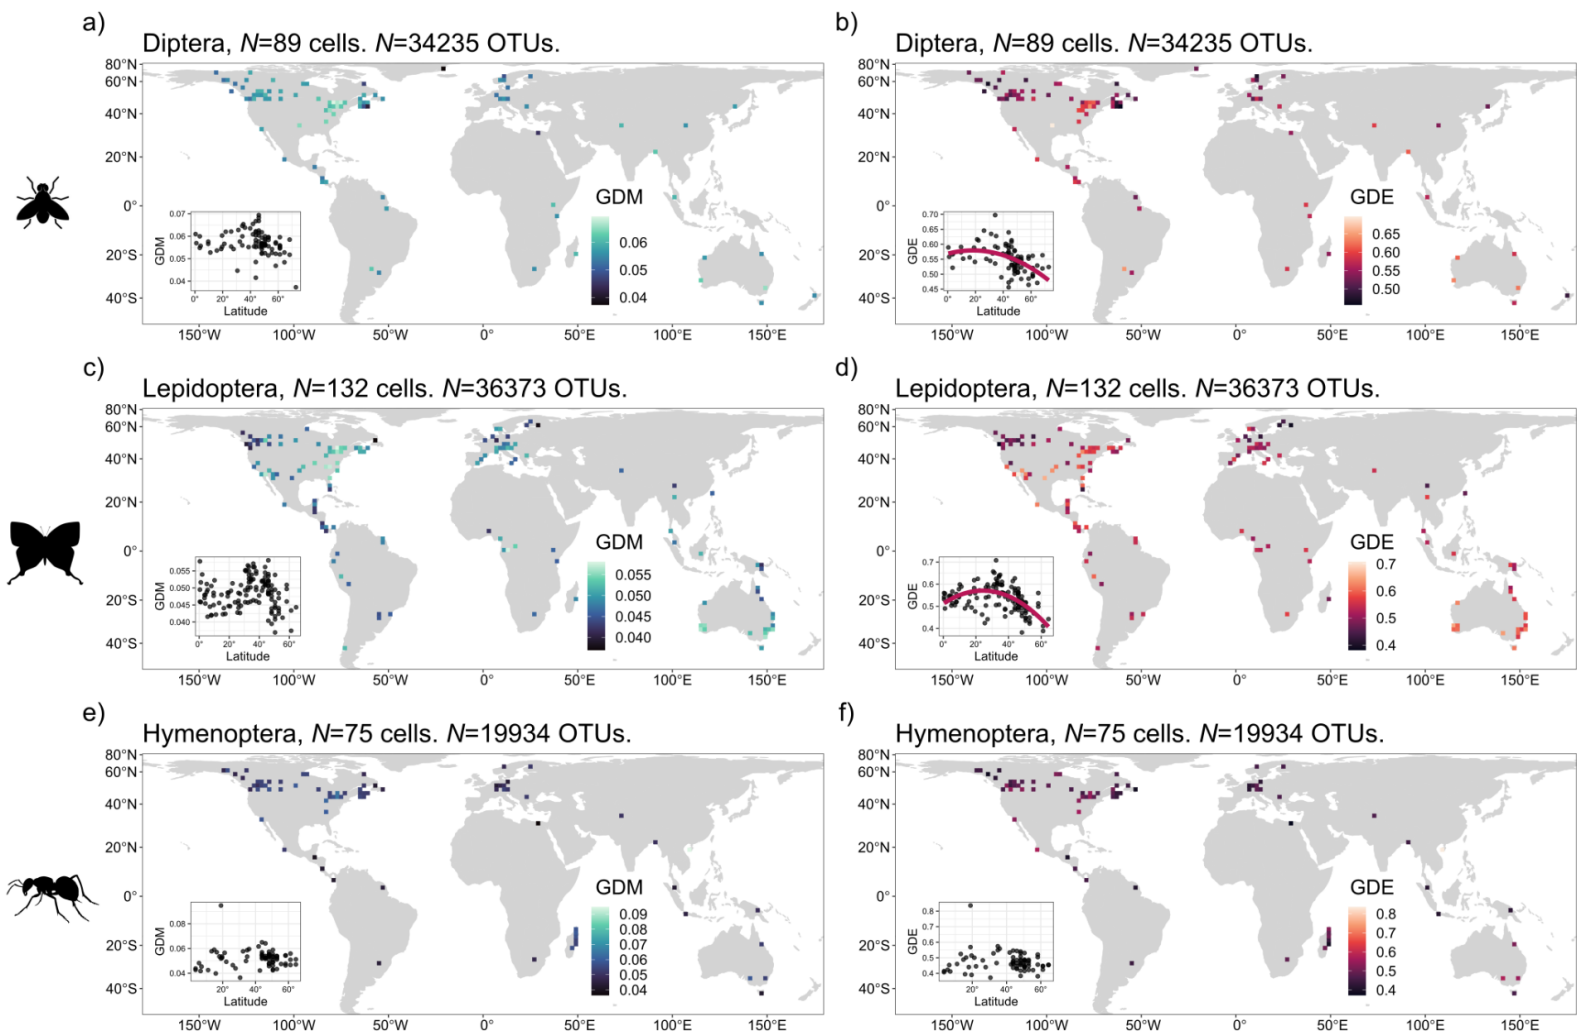

#### Fig. 4

Distributions of observed and predicted genetic diversity mean (GDM) and evenness (GDE).

The gray lines in (a) and (c) are 1000 random samples from the posterior distribution of the GDM and GDE models. The blue and red lines are the observed distributions of GDM and GDE, respectively. The boxplot overlaid on (c) illustrates the higher observed GDE in areas that do not freeze (minimum temperature  $> 0^{\circ}\text{C}$ ) versus GDE in areas that do freeze (minimum temperature  $\leq 0^{\circ}$ ). The boxplot center represents the median of the data, while the lower and upper hinges correspond to the first and third quartiles. The whiskers extend to the largest value no further than 1.5 times the inter-quartile range from the hinge. The observed differences in GDE are reflected in the posterior draws, which we highlight with two gray, dashed lines drawn through the medians of the observed data. Bayesian  $R^2$  posterior distributions are shown as insets in (a) and (c). The posterior distributions of the slopes for each predictor variable are shown in (b) and (d). The thin bars under each density plot indicate the 95% HDI and the thick bars indicate the 90% HDI. PWM = precipitation of the wettest month; PDM = precipitation of the driest month; MTWM = maximum temperature of the warmest month; Temp. Trend = historical temperature trend since the last glacial maximum; Precip. Trend = historical precipitation trend since the LGM.

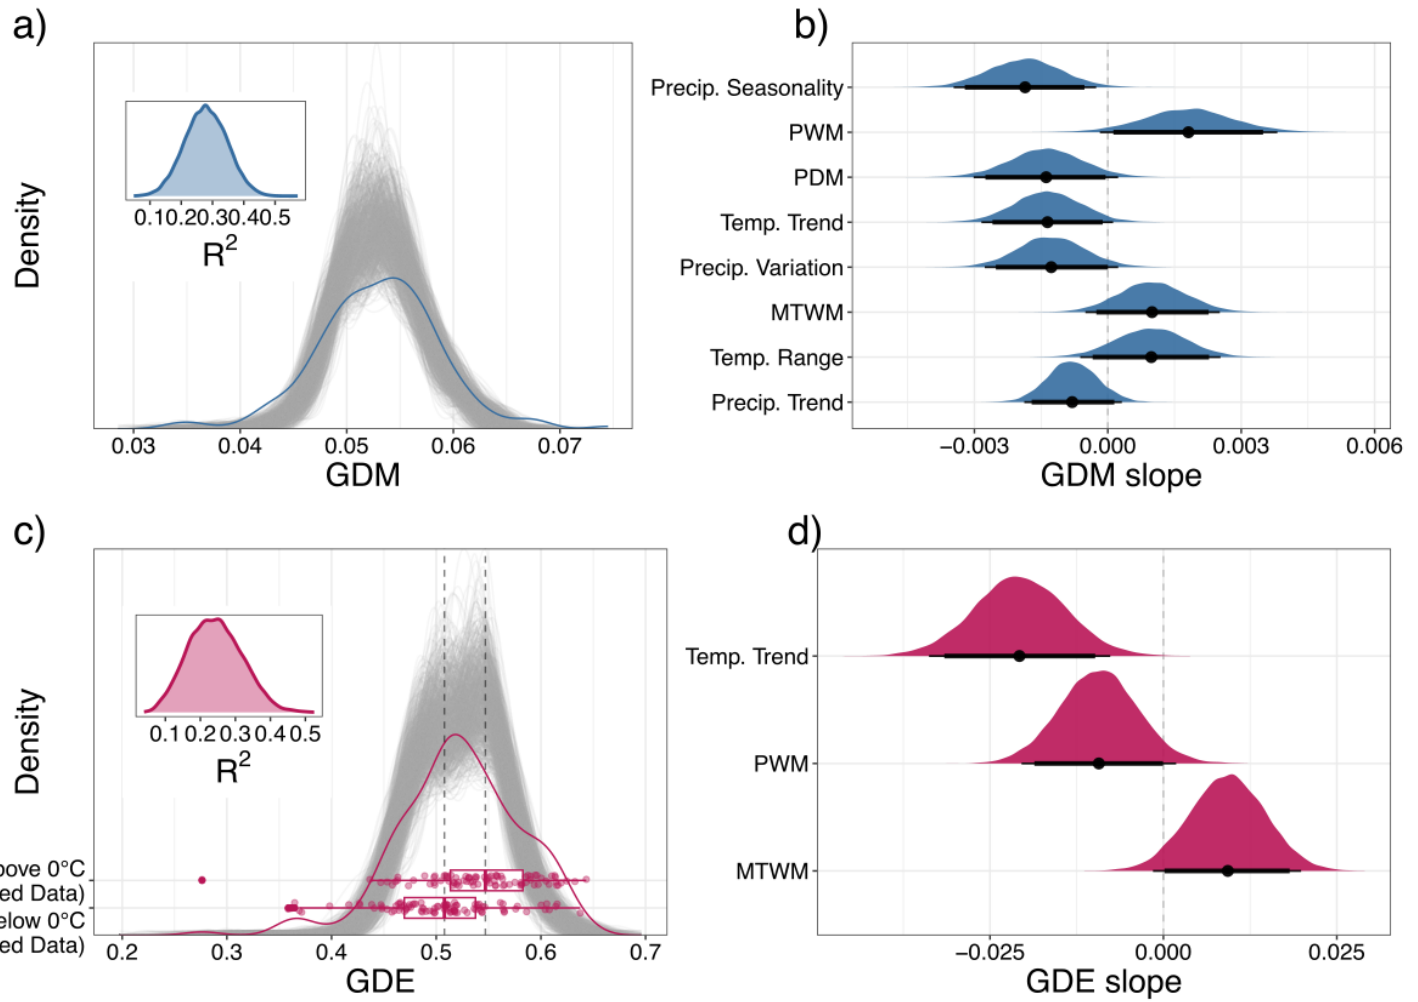



## Tables

Table 1

Results for spatially modified t-test correlations between GDM, GDE, and latitude.

| <b>Model</b>                      | <b>Term</b>      | <b><i>r</i></b> | <b><i>F</i>-statistic</b> | <b><i>DOF</i></b> | <b><i>p</i>-value</b> |
|-----------------------------------|------------------|-----------------|---------------------------|-------------------|-----------------------|
| GDM ~ latitude                    | linear           | -0.018          | 0.009                     | 29.596            | 0.924                 |
| GDM ~ latitude <sup>2</sup>       | quadratic        | 0.053           | 0.089                     | 0.767             | 0.767                 |
| GDE ~ latitude                    | linear           | -0.280          | 3.617                     | 42.562            | 0.064                 |
| <b>GDE ~ latitude<sup>2</sup></b> | <b>quadratic</b> | <b>-0.360</b>   | <b>5.730</b>              | <b>38.550</b>     | <b>0.022</b>          |

Correlations were inferred for both linear and quadratic relationships. The bolded row indicates the relationship that is significant at  $\alpha = 0.05$ .  $r$  = Pearson's correlation coefficient,  $DOF$  = degrees of freedom.

Table 2

Results of the spatial linear modeling of environmental correlates for GDM and GDE.

| Response | Predictor variables                                                                             | Median R <sup>2</sup> | Lower 95% HDI | Upper 95% HDI | Moran's I | p-value (Moran's I) |
|----------|-------------------------------------------------------------------------------------------------|-----------------------|---------------|---------------|-----------|---------------------|
| GDM      | Precip. seasonality, PWM, PDM, temp. trend, precip. variation, MTWM, temp. range, precip. trend | 0.279                 | 0.146         | 0.407         | -0.038    | 0.738               |
| GDE      | Temp trend, PWM, MTWM                                                                           | 0.240                 | 0.101         | 0.390         | -0.043    | 0.708               |

Columns 3-5 contain a summary of the Bayesian R<sup>2</sup> model fit statistic. Residual spatial autocorrelation for each model was calculated using Moran's I and 10,000 simulations were used to calculate a p-value. HDI = highest density interval; PWM = precipitation of the wettest month; PDM = precipitation of the driest month; MTWM = maximum temperature of the warmest month; Temp. Trend = historical temperature trend since the last glacial maximum (LGM); Precip. Trend = historical precipitation trend since the LGM.

## References

1. Jenkins, C. N., Pimm, S. L. & Joppa, L. N. Global patterns of terrestrial vertebrate diversity and conservation. *Proc. Natl. Acad. Sci. U. S. A.* **110**, E2602–10 (2013).
2. Jarzyna, M. A., Quintero, I. & Jetz, W. Global functional and phylogenetic structure of avian assemblages across elevation and latitude. *Ecol. Lett.* **24**, 196–207 (2021).
3. Faith, D. P. Conservation evaluation and phylogenetic diversity. *Biol. Conserv.* **61**, 1–10 (1992).
4. Howard, C., Stephens, P. A., Pearce-Higgins, J. W., Gregory, R. D. & Willis, S. G. The drivers of avian abundance: patterns in the relative importance of climate and land use. *Glob. Ecol. Biogeogr.* **24**, 1249–1260 (2015).
5. Callaghan, C. T., Nakagawa, S. & Cornwell, W. K. Global abundance estimates for 9,700 bird species. *Proc. Natl. Acad. Sci. U. S. A.* **118**, (2021).
6. Cardoso, P., Pekár, S., Jocqué, R. & Coddington, J. A. Global patterns of guild composition and functional diversity of spiders. *PLoS One* **6**, e21710 (2011).
7. Safi, K. *et al.* Understanding global patterns of mammalian functional and phylogenetic diversity. *Philos. Trans. R. Soc. Lond. B Biol. Sci.* **366**, 2536–2544 (2011).
8. Ratnasingham, S. & Hebert, P. D. N. bold: The Barcode of Life Data System (<http://www.barcodinglife.org>). *Mol. Ecol. Notes* **7**, 355–364 (2007).
9. Lawrence, E. R. *et al.* Geo-referenced population-specific microsatellite data across American continents, the MacroPopGen Database. *Sci Data* **6**, 14 (2019).
10. Benson, D. A. *et al.* GenBank. *Nucleic Acids Res.* **41**, D36–42 (2013).
11. Arribas, P., Andújar, C. & Salces-Castellano, A. The limited spatial scale of dispersal in soil arthropods revealed with whole-community haplotype-level metabarcoding. *Molecular* (2021).

12. Macher, J.-N., Macher, T.-H. & Leese, F. Combining NCBI and BOLD databases for OTU assignment in metabarcoding and metagenomic datasets: The BOLD\_NCBI\_Merger. *Metabarcoding and Metagenomics* vol. 1 e22262 Preprint at <https://doi.org/10.3897/mbmg.1.22262> (2017).
13. Stange, M., Barrett, R. D. H. & Hendry, A. P. The importance of genomic variation for biodiversity, ecosystems and people. *Nat. Rev. Genet.* **22**, 89–105 (2021).
14. Des Roches, S., Pendleton, L. H., Shapiro, B. & Palkovacs, E. P. Conserving intraspecific variation for nature’s contributions to people. *Nat Ecol Evol* (2021) doi:10.1038/s41559-021-01403-5.
15. Schmidt, C. & Garroway, C. J. The conservation utility of mitochondrial genetic diversity in macrogenetic research. *Conserv. Genet.* (2021) doi:10.1007/s10592-021-01333-6.
16. Blanchet, S., Prunier, J. G. & De Kort, H. Time to Go Bigger: Emerging Patterns in Macrogenetics. *Trends Genet.* **33**, 579–580 (2017).
17. Hoban, S. *et al.* Global commitments to conserving and monitoring genetic diversity are now necessary and feasible. *Bioscience* (2021) doi:10.1093/biosci/biab054.
18. Santini, L. *et al.* The interface between Macroecology and Conservation: existing links and untapped opportunities. *Frontiers of Biogeography* **13**, (2021).
19. Leigh, D. M. *et al.* Opportunities and challenges of macrogenetic studies. *Nat. Rev. Genet.* (2021) doi:10.1038/s41576-021-00394-0.
20. Teixeira, J. C. & Huber, C. D. The inflated significance of neutral genetic diversity in conservation genetics. *Proc. Natl. Acad. Sci. U. S. A.* **118**, (2021).
21. DeWoody, J. A., Harder, A. M., Mathur, S. & Willoughby, J. R. The long-standing significance of genetic diversity in conservation. *Molecular ecology* vol. 30 4147–4154 (2021).
22. García-Dorado, A. & Caballero, A. Neutral genetic diversity as a useful tool for conservation biology. *Conserv. Genet.* **22**, 541–545 (2021).

23. Reed, D. H. & Frankham, R. Correlation between fitness and genetic diversity. *Conserv. Biol.* **17**, 230–237 (2003).
24. Theodoridis, S. *et al.* Evolutionary history and past climate change shape the distribution of genetic diversity in terrestrial mammals. *Nat. Commun.* **11**, 2557 (2020).
25. Manel, S. *et al.* Global determinants of freshwater and marine fish genetic diversity. *Nat. Commun.* **11**, 692 (2020).
26. Miraldo, A. *et al.* An Anthropocene map of genetic diversity. *Science* **353**, 1532–1535 (2016).
27. Gratton, P. *et al.* Which Latitudinal Gradients for Genetic Diversity? *Trends in ecology & evolution* vol. 32 724–726 (2017).
28. Barrow, L. N., Masiero da Fonseca, E., Thompson, C. E. P. & Carstens, B. C. Predicting amphibian intraspecific diversity with machine learning: Challenges and prospects for integrating traits, geography, and genetic data. *Mol. Ecol. Resour.* (2020)  
doi:10.1111/1755-0998.13303.
29. Millette, K. L. *et al.* No consistent effects of humans on animal genetic diversity worldwide. *Ecol. Lett.* **23**, 55–67 (2020).
30. Theodoridis, S., Rahbek, C. & Nogues-Bravo, D. Exposure of mammal genetic diversity to mid-21st century global change. *Ecography* **44**, 817–831 (2021).
31. Pelletier, T. A. & Carstens, B. C. Geographical range size and latitude predict population genetic structure in a global survey. *Biol. Lett.* **14**, 20170566 (2018).
32. Losey, J. E. & Vaughan, M. The Economic Value of Ecological Services Provided by Insects. *Bioscience* **56**, 311–323 (2006).
33. Valiente-Banuet, A. *et al.* Beyond species loss: the extinction of ecological interactions in a changing world. *Funct. Ecol.* **29**, 299–307 (2015).
34. Dincă, V. *et al.* High resolution DNA barcode library for European butterflies reveals continental patterns of mitochondrial genetic diversity. *Commun Biol* **4**, 315 (2021).

35. Papadopoulou, A. *et al.* Testing the Species–Genetic Diversity Correlation in the Aegean Archipelago: Toward a Haplotype-Based Macroecology? *Am. Nat.* **178**, 241–255 (2011).
36. Salinas-Ivanenko, S. & Múrria, C. Macroecological trend of increasing values of intraspecific genetic diversity and population structure from temperate to tropical streams. *Glob. Ecol. Biogeogr.* **30**, 1685–1697 (2021).
37. Baselga, A. *et al.* Whole-community DNA barcoding reveals a spatio-temporal continuum of biodiversity at species and genetic levels. *Nat. Commun.* **4**, 1892 (2013).
38. Dapporto, L. *et al.* Integrating three comprehensive data sets shows that mitochondrial DNA variation is linked to species traits and paleogeographic events in European butterflies. *Mol. Ecol. Resour.* **19**, 1623–1636 (2019).
39. Satler, J. D., Carstens, B. C., Garrick, R. C. & Espíndola, A. The Phylogeographic Shortfall in Hexapods: A Lot of Leg Work Remaining. *Insect Syst Divers* **5**, 1 (2021).
40. Wilson, R. J. & Fox, R. Insect responses to global change offer signposts for biodiversity and conservation. *Ecol. Entomol.* **46**, 699–717 (2021).
41. Wagner, D. L., Grames, E. M., Forister, M. L., Berenbaum, M. R. & Stopak, D. Insect decline in the Anthropocene: Death by a thousand cuts. *Proc. Natl. Acad. Sci. U. S. A.* **118**, (2021).
42. Gallien, L. & Carboni, M. The community ecology of invasive species: where are we and what's next? *Ecography* **40**, 335–352 (2017).
43. Smith-Ramesh, L. M., Moore, A. C. & Schmitz, O. J. Global synthesis suggests that food web connectance correlates to invasion resistance. *Glob. Chang. Biol.* **23**, 465–473 (2017).
44. Raven, P. H. & Wagner, D. L. Agricultural intensification and climate change are rapidly decreasing insect biodiversity. *Proc. Natl. Acad. Sci. U. S. A.* **118**, (2021).
45. Halsch, C. A. *et al.* Insects and recent climate change. *Proc. Natl. Acad. Sci. U. S. A.* **118**, (2021).
46. Powney, G. D. *et al.* Widespread losses of pollinating insects in Britain. *Nat. Commun.* **10**,

- 1018 (2019).
47. van Klink, R. *et al.* Meta-analysis reveals declines in terrestrial but increases in freshwater insect abundances. *Science* **368**, 417–420 (2020).
  48. Forister, M. L., Pelton, E. M. & Black, S. H. Declines in insect abundance and diversity: We know enough to act now. *Conservat Sci and Prac* **1**, (2019).
  49. Didham, R. K. *et al.* Interpreting insect declines: seven challenges and a way forward. *Insect Conserv. Divers.* **13**, 103–114 (2020).
  50. Montgomery, G. A. *et al.* Is the insect apocalypse upon us? How to find out. *Biol. Conserv.* **241**, 108327 (2020).
  51. Crossley, M. S. *et al.* No net insect abundance and diversity declines across US Long Term Ecological Research sites. *Nat Ecol Evol* **4**, 1368–1376 (2020).
  52. Fox, R. *et al.* Insect population trends and the IUCN Red List process. *J. Insect Conserv.* **23**, 269–278 (2019).
  53. Cardoso, P., Erwin, T. L., Borges, P. A. V. & New, Tim R. The seven impediments in invertebrate conservation and how to overcome them. *Biol. Conserv.* **144**, 2647–2655 (2011).
  54. Diniz-Filho, J. A. F., de Marco, P., Jr & Hawkins, B. A. Defying the curse of ignorance: perspectives in insect macroecology and conservation biogeography. *Insect Conserv. Divers.* (2010) doi:10.1111/j.1752-4598.2010.00091.x.
  55. Grames, E. M. *et al.* Trends in global insect abundance and biodiversity: A community-driven systematic map protocol. *Open Science Framework* (2019).
  56. Li, X. & Wiens, J. J. Estimating Global Biodiversity: the Role of Cryptic Insect Species. *Syst. Biol.* (2022) doi:10.1093/sysbio/syac069.
  57. Wheeler, Q. D., Raven, P. H. & Wilson, E. O. Taxonomy: Impediment or expedient? *Science* **303**, 285 (2004).
  58. Stribling, J. B., Pavlik, K. L., Holdsworth, S. M. & Leppo, E. W. Data quality, performance,

- and uncertainty in taxonomic identification for biological assessments. *J. North Am. Benthol. Soc.* **27**, 906–919 (2008).
59. Hebert, P. D. N. *et al.* Counting animal species with DNA barcodes: Canadian insects. *Philos. Trans. R. Soc. Lond. B Biol. Sci.* **371**, (2016).
  60. Meier, R. *et al.* A re-analysis of the data in Sharkey *et al.*'s (2021) minimalist revision reveals that BINs do not deserve names, but BOLD Systems needs a stronger commitment to open science. *bioRxiv* 2021.04.28.441626 (2021) doi:10.1101/2021.04.28.441626.
  61. Hickerson, M. J., Meyer, C. & Moritz, C. DNA-Barcoding will often fail to discover new animal species over broad parameter space. *Syst. Biol.* **55**, 729–739 (2006).
  62. Allio, R., Donega, S., Galtier, N. & Nabholz, B. Large variation in the ratio of mitochondrial to nuclear mutation rate across animals: implications for genetic diversity and the use of mitochondrial DNA as a molecular marker. *Mol. Biol. Evol.* **34**, 2762–2772 (2017).
  63. Hudson, R. R. & Turelli, M. Stochasticity overrules the 'three-times rule': genetic drift, genetic draft, and coalescence times for nuclear loci versus mitochondrial DNA. *Evolution* **57**, 182–190 (2003).
  64. Meiklejohn, C. D., Montooth, K. L. & Rand, D. M. Positive and negative selection on the mitochondrial genome. *Trends Genet.* **23**, 259–263 (2007).
  65. Hurst, G. D. D. & Jiggins, F. M. Problems with mitochondrial DNA as a marker in population, phylogeographic and phylogenetic studies: the effects of inherited symbionts. *Proc. Biol. Sci.* **272**, 1525–1534 (2005).
  66. Paz-Vinas, I. *et al.* Macrogenetic studies must not ignore limitations of genetic markers and scale. *Authorea Preprints* (2021) doi:10.22541/au.161401200.09787142/v1.
  67. Galtier, N., Nabholz, B., Glémin, S. & Hurst, G. D. D. Mitochondrial DNA as a marker of molecular diversity: a reappraisal. *Mol. Ecol.* **18**, 4541–4550 (2009).
  68. Deiner, K. *et al.* Environmental DNA metabarcoding: Transforming how we survey animal and plant communities. *Mol. Ecol.* **26**, 5872–5895 (2017).



69. Sigsgaard, E. E. *et al.* Population-level inferences from environmental DNA-Current status and future perspectives. *Evol. Appl.* **13**, 245–262 (2020).
70. Lewin, H. A. *et al.* Earth BioGenome Project: Sequencing life for the future of life. *Proc. Natl. Acad. Sci. U. S. A.* **115**, 4325–4333 (2018).
71. Riginos, C. *et al.* Building a global genomics observatory: Using GEOME (the Genomic Observatories Metadatabase) to expedite and improve deposition and retrieval of genetic data and metadata for biodiversity research. *Mol. Ecol. Resour.* **20**, 1458–1469 (2020).
72. Overcast, I., Emerson, B. C. & Hickerson, M. J. An integrated model of population genetics and community ecology. *J. Biogeogr.* **46**, 816–829 (2019).
73. Overcast, I. *et al.* A unified model of species abundance, genetic diversity, and functional diversity reveals the mechanisms structuring ecological communities. *Mol. Ecol. Resour.* **21**, 2782–2800 (2021).
74. Wallace, A. R. & Harvard University. *Tropical nature, and other essays.* (London, Macmillan and co., 1878).
75. Janzen, D. H. Why Mountain Passes are Higher in the Tropics. *Am. Nat.* **101**, 233–249 (1967).
76. Moreau, C. S. & Bell, C. D. Testing the museum versus cradle tropical biological diversity hypothesis: phylogeny, diversification, and ancestral biogeographic range evolution of the ants. *Evolution* **67**, 2240–2257 (2013).
77. Buffalo, V. Quantifying the relationship between genetic diversity and population size suggests natural selection cannot explain Lewontin's Paradox. *Elife* **10**, (2021).
78. Stebbins, G. L. *Flowering Plants: Evolution above the Species Level.* (Harvard University Press, 1974). doi:10.4159/harvard.9780674864856.
79. Gaston, K. J. & Blackburn, T. M. The tropics as a museum of biological diversity: an analysis of the New World avifauna. *Proceedings of the Royal Society of London. Series B: Biological Sciences* **263**, 63–68 (1996).

80. Chown, S. L. & Gaston, K. J. Areas, cradles and museums: the latitudinal gradient in species richness. *Trends Ecol. Evol.* **15**, 311–315 (2000).
81. Stevens, G. C. The Latitudinal Gradient in Geographical Range: How so Many Species Coexist in the Tropics. *Am. Nat.* **133**, 240–256 (1989).
82. Ruggiero, A. & Werenkraut, V. One-dimensional analyses of Rapoport's rule reviewed through meta-analysis. *Glob. Ecol. Biogeogr.* **16**, 401–414 (2007).
83. Hewitt, G. The genetic legacy of the Quaternary ice ages. *Nature* **405**, 907–913 (2000).
84. Carnaval, A. C., Hickerson, M. J., Haddad, C. F. B., Rodrigues, M. T. & Moritz, C. Stability predicts genetic diversity in the Brazilian Atlantic forest hotspot. *Science* **323**, 785–789 (2009).
85. Anderson, S. C. & Ward, E. J. Black swans in space: modeling spatiotemporal processes with extremes. *Ecology* **100**, e02403 (2019).
86. Srivathsan, A. *et al.* Global convergence of dominance and neglect in flying insect diversity. *bioRxiv* 2022.08.02.502512 (2022) doi:10.1101/2022.08.02.502512.
87. Hagen, O., Skeels, A., Onstein, R. E., Jetz, W. & Pellissier, L. Earth history events shaped the evolution of uneven biodiversity across tropical moist forests. *Proc. Natl. Acad. Sci. U. S. A.* **118**, (2021).
88. Kass, J. M. *et al.* The global distribution of known and undiscovered ant biodiversity. *Sci Adv* **8**, eabp9908 (2022).
89. Condamine, F. L., Sperling, F. A. H., Wahlberg, N., Rasplus, J.-Y. & Kergoat, G. J. What causes latitudinal gradients in species diversity? Evolutionary processes and ecological constraints on swallowtail biodiversity. *Ecol. Lett.* **15**, 267–277 (2012).
90. Dunn, R. R. *et al.* Climatic drivers of hemispheric asymmetry in global patterns of ant species richness. *Ecol. Lett.* **12**, 324–333 (2009).
91. Economo, E. P., Narula, N., Friedman, N. R., Weiser, M. D. & Guénard, B. Macroecology and macroevolution of the latitudinal diversity gradient in ants. *Nat. Commun.* **9**, 1778

- (2018).
92. Privet, K. & Petillon, J. Differences in tropical vs. temperate diversity in arthropod predators provide insights into causes of latitudinal gradients of species diversity. *bioRxiv* 283499 (2018) doi:10.1101/283499.
  93. Kreft, H. & Jetz, W. Global patterns and determinants of vascular plant diversity. *Proc. Natl. Acad. Sci. U. S. A.* **104**, 5925–5930 (2007).
  94. Orr, M. C. *et al.* Global Patterns and Drivers of Bee Distribution. *Curr. Biol.* **31**, 451–458.e4 (2021).
  95. Vellend, M. Island biogeography of genes and species. *Am. Nat.* **162**, 358–365 (2003).
  96. Hubbell, S. P. *The Unified Neutral Theory of Biodiversity and Biogeography*. (Princeton University Press, 2001). doi:10.1515/9781400837526.
  97. Laroche, F., Jarne, P., Lamy, T., David, P. & Massol, F. A neutral theory for interpreting correlations between species and genetic diversity in communities. *Am. Nat.* **185**, 59–69 (2015).
  98. Lamy, T., Laroche, F., David, P., Massol, F. & Jarne, P. The contribution of species-genetic diversity correlations to the understanding of community assembly rules. *Oikos* **126**, 759–771 (2017).
  99. Bazin, E., Glémin, S. & Galtier, N. Population size does not influence mitochondrial genetic diversity in animals. *Science* **312**, 570–572 (2006).
  100. Manel, S. *et al.* Global determinants of freshwater and marine fish genetic diversity. *Nat. Commun.* **11**, 692 (2020).
  101. Labandeira, C. C. & Sepkoski, J. J., Jr. Insect diversity in the fossil record. *Science* **261**, 310–315 (1993).
  102. Grimaldi, D., Engel, M. S., . Engel, M. S. & Senior Curator and Professor Michael S Engel. *Evolution of the Insects*. (Cambridge University Press, 2005).
  103. Mitton, J. B. *Selection in Natural Populations*. (Oxford University Press, 2000).

104. Exposito-Alonso, M. *et al.* Genetic diversity loss in the Anthropocene. *Science* **377**, 1431–1435 (2022).
105. Tajima, F. Evolutionary relationship of DNA sequences in finite populations. *Genetics* **105**, 437–460 (1983).
106. Nordborg, M. & Krone, S. Separation of time scales and convergence to the coalescent in structured populations. in *Modern Developments in Theoretical Population Genetics* (eds. Slatkin, M. & Veuille, M.) 194–232 (Oxford University Press, 2001).
107. Charlesworth, B. & Charlesworth, D. *Elements of Evolutionary Genetics*. (W. H. Freeman, 2010).
108. Addo-Bediako, A., Chown, S. L. & Gaston, K. J. Thermal tolerance, climatic variability and latitude. *Proc. Biol. Sci.* **267**, 739–745 (2000).
109. Tougeron, K. Diapause research in insects: historical review and recent work perspectives. *Entomol. Exp. Appl.* **167**, 27–36 (2019).
110. Danks, H. V. & Others. The wider integration of studies on insect cold-hardiness. *Eur. J. Entomol.* **93**, 383–404 (1996).
111. Hewitt, G. The genetic legacy of the Quaternary ice ages. *Nature* **405**, 907–913 (2000).
112. Dynesius, M. & Jansson, R. Evolutionary consequences of changes in species' geographical distributions driven by Milankovitch climate oscillations. *Proc. Natl. Acad. Sci. U. S. A.* **97**, 9115–9120 (2000).
113. Qu, Y. *et al.* Long-term isolation and stability explain high genetic diversity in the Eastern Himalaya. *Mol. Ecol.* **23**, 705–720 (2014).
114. Morgan, K. *et al.* Comparative phylogeography reveals a shared impact of pleistocene environmental change in shaping genetic diversity within nine Anopheles mosquito species across the Indo-Burma biodiversity hotspot. *Mol. Ecol.* **20**, 4533–4549 (2011).
115. Earl, C. *et al.* Spatial phylogenetics of butterflies in relation to environmental drivers and angiosperm diversity across North America. *iScience* **0**, (2021).

116. Rix, M. G. *et al.* Biogeography and speciation of terrestrial fauna in the south-western Australian biodiversity hotspot. *Biol. Rev. Camb. Philos. Soc.* **90**, 762–793 (2015).
117. Myers, N., Mittermeier, R. A., Mittermeier, C. G., da Fonseca, G. A. B. & Kent, J. Biodiversity hotspots for conservation priorities. *Nature* **403**, 853–858 (2000).
118. Vellend, M. *The Theory of Ecological Communities (MPB-57)*. (Princeton University Press, 2016).
119. Hawkins, B. A. & DeVries, P. J. Tropical niche conservatism and the species richness gradient of North American butterflies. *J. Biogeogr.* **36**, 1698–1711 (2009).
120. Pilowsky, J. A., Colwell, R. K., Rahbek, C. & Fordham, D. A. Process-explicit models reveal the structure and dynamics of biodiversity patterns. *Sci Adv* **8**, eabj2271 (2022).
121. Hagen, O. *et al.* gen3sis: A general engine for eco-evolutionary simulations of the processes that shape Earth's biodiversity. *PLoS Biol.* **19**, e3001340 (2021).
122. Hagen, O. Coupling eco-evolutionary mechanisms with deep-time environmental dynamics to understand biodiversity patterns. *Ecography* (2022) doi:10.1111/ecog.06132.
123. Barbour, M. A. *et al.* Genetic specificity of a plant-insect food web: Implications for linking genetic variation to network complexity. *Proc. Natl. Acad. Sci. U. S. A.* **113**, 2128–2133 (2016).
124. Mopper, S. Adaptive genetic structure in phytophagous insect populations. *Trends Ecol. Evol.* **11**, 235–238 (1996).
125. Tarpy, D. R., Vanengelsdorp, D. & Pettis, J. S. Genetic diversity affects colony survivorship in commercial honey bee colonies. *Naturwissenschaften* **100**, 723–728 (2013).
126. Keith, A. R., Bailey, J. K., Lau, M. K. & Whitham, T. G. Genetics-based interactions of foundation species affect community diversity, stability and network structure. *Proc. Biol. Sci.* **284**, (2017).
127. Shuster, S. M., Lonsdorf, E. V., Wimp, G. M., Bailey, J. K. & Whitham, T. G. Community heritability measures the evolutionary consequences of indirect genetic effects on

- community structure. *Evolution* **60**, 991–1003 (2006).
128. Barbour, M. A. & Fortuna, M. A. Genetic specificity of a plant–insect food web: Implications for linking genetic variation to network complexity. *Proceedings of the* (2016).
129. Raffard, A., Santoul, F., Cucherousset, J. & Blanchet, S. The community and ecosystem consequences of intraspecific diversity: a meta-analysis. *Biol. Rev. Camb. Philos. Soc.* **94**, 648–661 (2019).
130. Riggio, J. *et al.* Global human influence maps reveal clear opportunities in conserving Earth’s remaining intact terrestrial ecosystems. *Glob. Chang. Biol.* (2020)  
doi:10.1111/gcb.15109.
131. Tsutsui, N. D., Suarez, A. V., Holway, D. A. & Case, T. J. Reduced genetic variation and the success of an invasive species. *Proc. Natl. Acad. Sci. U. S. A.* **97**, 5948–5953 (2000).
132. Frankham, R. Resolving the genetic paradox in invasive species. *Heredity* **94**, 385 (2005).
133. Pelletier, T. A. *et al.* phylogatR : Phylogeographic data aggregation and repurposing. *Molecular Ecology Resources* vol. 22 2830–2842 Preprint at <https://doi.org/10.1111/1755-0998.13673> (2022).
134. Jansen, J. *et al.* Stop ignoring map uncertainty in biodiversity science and conservation policy. *Nat Ecol Evol* **6**, 828–829 (2022).
135. Hortal, J. *et al.* Seven Shortfalls that Beset Large-Scale Knowledge of Biodiversity. *Annu. Rev. Ecol. Evol. Syst.* **46**, 523–549 (2015).
136. Coddington, J. A., Agnarsson, I., Miller, J. A., Kuntner, M. & Hormiga, G. Undersampling bias: the null hypothesis for singleton species in tropical arthropod surveys. *J. Anim. Ecol.* **78**, 573–584 (2009).
137. Leigh, D. M., Hendry, A. P., Vázquez-Domínguez, E. & Friesen, V. L. Estimated six per cent loss of genetic variation in wild populations since the industrial revolution. *Evol. Appl.* **12**, 1505–1512 (2019).
138. Wilson, E. O. The little things that run the world\* (the importance and conservation of

- invertebrates). *Conserv. Biol.* **1**, 344–346 (1987).
139. Ratnasingham, S. & Hebert, P. D. N. A DNA-based registry for all animal species: the barcode index number (BIN) system. *PLoS One* **8**, e66213 (2013).
140. Sievers, F. *et al.* Fast, scalable generation of high-quality protein multiple sequence alignments using Clustal Omega. *Mol. Syst. Biol.* **7**, 539 (2011).
141. Pallewatta, N., Reaser, J. K. & Gutierrez, A. T. Invasive alien species in South-Southeast Asia: national reports and directory of resources. *Invasive alien species in South-Southeast Asia: national reports and directory of resources*. (2003).
142. Hoban, S. *et al.* Genetic diversity targets and indicators in the CBD post-2020 Global Biodiversity Framework must be improved. *Biol. Conserv.* **248**, 108654 (2020).
143. Paz-Vinas, I. *et al.* Systematic conservation planning for intraspecific genetic diversity. *Proc. Biol. Sci.* **285**, (2018).
144. Nei, M. & Li, W. Mathematical model for studying variation in terms of restriction endonucleases. *Proc. Natl. Acad. Sci. U. S. A.* **76**, 5269–5273 (1979).
145. Gaggiotti, O. E. *et al.* Diversity from genes to ecosystems: A unifying framework to study variation across biological metrics and scales. *Evol. Appl.* **11**, 1176–1193 (2018).
146. Chao, A., Chiu, C.-H. & Jost, L. Unifying Species Diversity, Phylogenetic Diversity, Functional Diversity, and Related Similarity and Differentiation Measures Through Hill Numbers. *Annu. Rev. Ecol. Evol. Syst.* (2014)  
doi:10.1146/annurev-ecolsys-120213-091540.
147. Alberdi, A. & Gilbert, M. T. P. A guide to the application of Hill numbers to DNA-based diversity analyses. *Mol. Ecol. Resour.* **19**, 804–817 (2019).
148. Shannon, C. E. A mathematical theory of communication. *The Bell System Technical Journal* **27**, 379–423 (1948).
149. Hill, M. O. Diversity and Evenness: A Unifying Notation and Its Consequences. *Ecology* **54**, 427–432 (1973).

150. Maurer, B. A. & McGill, B. J. Measurement of species diversity. *Biological diversity: frontiers in measurement and assessment* 55–65 (2011).
151. Welch, B. L. The Significance of the Difference Between Two Means when the Population Variances are Unequal. *Biometrika* **29**, 350–362 (1938).
152. Karger, D. N. *et al.* Climatologies at high resolution for the earth's land surface areas. *Scientific Data* **4**, 170122 (2017).
153. Brown, J. L., Hill, D. J., Dolan, A. M., Carnaval, A. C. & Haywood, A. M. PaleoClim, high spatial resolution paleoclimate surfaces for global land areas. *Sci Data* **5**, 180254 (2018).
154. Tuanmu, M.-N. & Jetz, W. A global, remote sensing-based characterization of terrestrial habitat heterogeneity for biodiversity and ecosystem modelling. *Glob. Ecol. Biogeogr.* **24**, 1329–1339 (2015).
155. Kennedy, C. M., Oakleaf, J. R., Theobald, D. M., Baruch-Mordo, S. & Kiesecker, J. Managing the middle: A shift in conservation priorities based on the global human modification gradient. *Glob. Chang. Biol.* **25**, 811–826 (2019).
156. White, A. E., Dey, K. K., Mohan, D., Stephens, M. & Price, T. D. Regional influences on community structure across the tropical-temperate divide. *Nat. Commun.* **10**, 2646 (2019).
157. Goodrich, B., Gabry, J., Ali, I. & Brilleman, S. rstanarm: Bayesian applied regression modeling via Stan. *R package version 2*, 1758 (2018).
158. Piironen, J., Paasiniemi, M. & Vehtari, A. Projective inference in high-dimensional problems: Prediction and feature selection. *EJSS* **14**, 2155–2197 (2020).
159. Legendre, P. & Fortin, M. J. Spatial pattern and ecological analysis. *Vegetatio* **80**, 107–138 (1989).
160. Bivand, R. S. & Wong, D. W. S. Comparing implementations of global and local indicators of spatial association. *Test* **27**, 716–748 (2018).
161. Carpenter, B. *et al.* Stan: A Probabilistic Programming Language. *Journal of Statistical Software, Articles* **76**, 1–32 (2017).



162. Stan Development Team. RStan: the R interface to Stan. Preprint at <http://mc-stan.org/> (2020).
163. Gelman, A., Goodrich, B., Gabry, J. & Vehtari, A. R-squared for Bayesian Regression Models. *Am. Stat.* **73**, 307–309 (2019).
164. Gimenez, O., Morgan, B. J. T. & Brooks, S. P. Weak Identifiability in Models for Mark-Recapture-Recovery Data. in *Modeling Demographic Processes In Marked Populations* (eds. Thomson, D. L., Cooch, E. G. & Conroy, M. J.) 1055–1067 (Springer US, 2009). doi:10.1007/978-0-387-78151-8\_48.
165. Dutilleul, P., Clifford, P., Richardson, S. & Hemon, D. Modifying the t Test for Assessing the Correlation Between Two Spatial Processes. *Biometrics* **49**, 305–314 (1993).
166. Vallejos, R., Osorio, F. & Bevilacqua, M. *Spatial Relationships Between Two Georeferenced Variables: With Applications in R*. (Springer Nature, 2020).
167. Elith, J., Kearney, M. & Phillips, S. The art of modelling range-shifting species. *Methods Ecol. Evol.* **1**, 330–342 (2010).

## Acknowledgements

We thank Jason L Brown for his valuable feedback on early drafts of the manuscript, and the Anderson, Hickerson, and Carnaval labs at City College of New York for their feedback at every step of the project. CMF, MJH, ACC, IO and AR acknowledge support from NSF DBI 2104147 and the NSF RCN Cross-Scale Processes Impacting Biodiversity (DEB 1745562). DJL was funded by NSF DEB-1541557. JMK was supported by the Japan Society for the Promotion of Science Postdoctoral Fellowships for Foreign Researchers Program.

## Author contributions

C.M.F., L.D.B., and M.J.H. conceived of the study. C.M.F., L.D.B., J.M.K., K.A.M., I.O., A.R., P.S., A.C.C., and M.J.H. framed the study. C.M.F., L.D.B., and M.J.H. carried out the analyses. C.M.F., and M.J.H. led the writing. All authors contributed to interpretation of the results and to the writing, and all have approved the submission. A.R. and P.S. contributed to Figure 1.

## Competing interests

The authors declare no competing interests.
